# Supplementary material
Source: PubMed Central journal article supplement (PMC3668812)
Supplement: JCI68775sd.pdf [file JCI68775sd.pdf]

## Supplemental Methods

*White matter extract ELISA.* For the preparation of white matter extract, frozen brain white matter tissue from a healthy donor was finely cut and homogenized in ice-cold PBS buffer containing 1.0% Nonidet P-40 and protease inhibitors using a glass Dounce apparatus. Insoluble matter was removed by centrifugation at 20,000 x g for 20 min. The supernatant was cleared of debris using a 0.45 µm filter and IgG was removed from the extract by using a mixture of protein A and protein G beads (GE Healthcare). The resulting protein extract was used to coat ELISA plates at a concentration of 1 µg/ml, and the ELISA was performed as previously described (Wardemann H et al., Science 2003).

*KREC assay.* Genomic DNA was isolated from flow cytometrically sorted B cell fractions by lysing cell pellets in 10 mM Tris-HCl, pH 8.0, containing 100 µg/ml proteinase K (Roche), incubating for 1 h at 56°C, and heat inactivating the enzyme at 95°C for 10 min. Two separate RQ-PCR reactions were performed, one reaction to amplify the signal joint and the other to amplify the coding joint, as previously reported (van Zelm MC et al., J Exp Med 2007). The number of cell divisions was calculated by subtracting the cycle threshold of the PCR detecting the coding joint from that of the PCR detecting the signal joint.

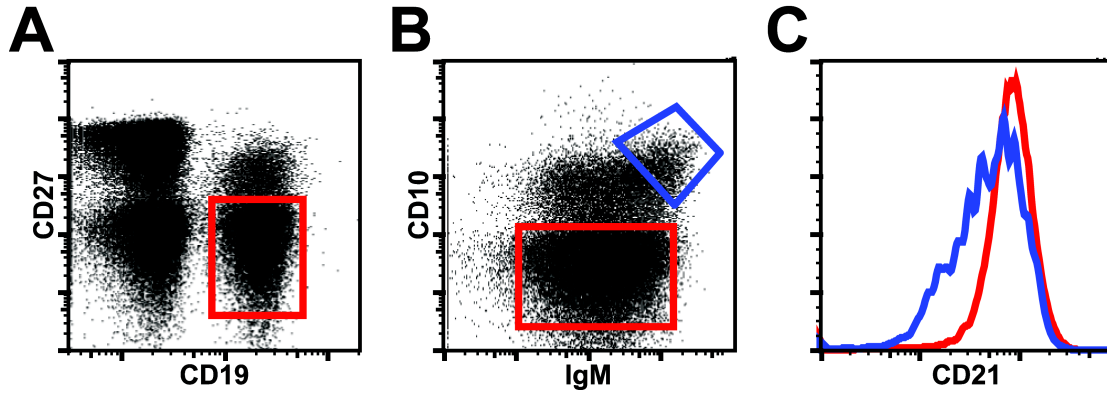

**Supplemental Figure 1. Sorting strategy for new emigrant/transitional and mature naive B cells.** Naive B cells (CD19<sup>+</sup>CD27<sup>-</sup>, red) were first sorted based on the expression of CD19 and CD27 (**A**), and further divided into new emigrant/transitional (IgM<sup>hi</sup>CD10<sup>hi</sup>, blue) and mature naive (IgM<sup>+</sup>CD10<sup>-</sup>, red) B cell subsets (**B**). The expression of CD21 within these subsets is shown in (**C**).

Mature naïve B cells

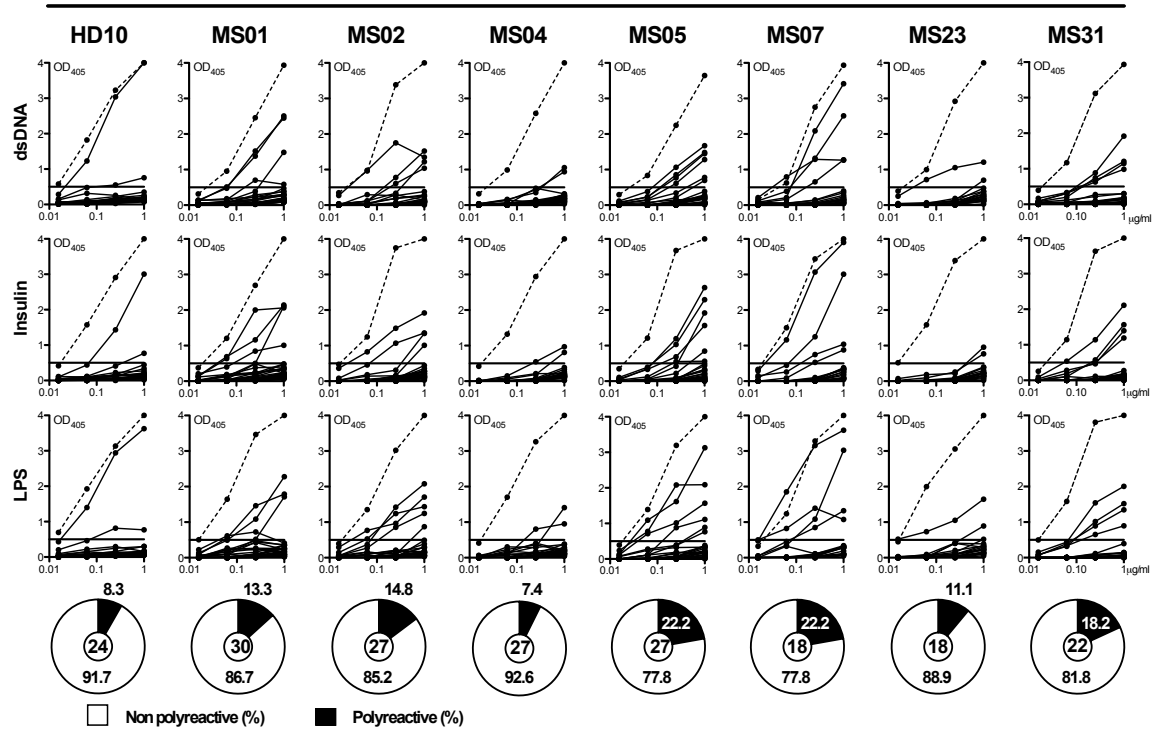

**Supplemental Figure 2. Increased frequencies of polyreactive mature naïve B cells in MS patients.** Antibodies from mature naïve B cells from a healthy donor and MS patients were tested by ELISA for reactivity against dsDNA, insulin and lipopolysaccharide (LPS). Antibodies were considered polyreactive when they could recognize all 3 antigens. Dotted lines show ED45-positive control and solid lines show binding for each cloned recombinant antibody. Horizontal lines define cutoff  $OD_{405nm}$  for positive reactivity. For each individual, the frequency of polyreactive (filled area) and nonpolyreactive (open area) clones is summarized in pie charts, with the total number of clones tested indicated in the centers.

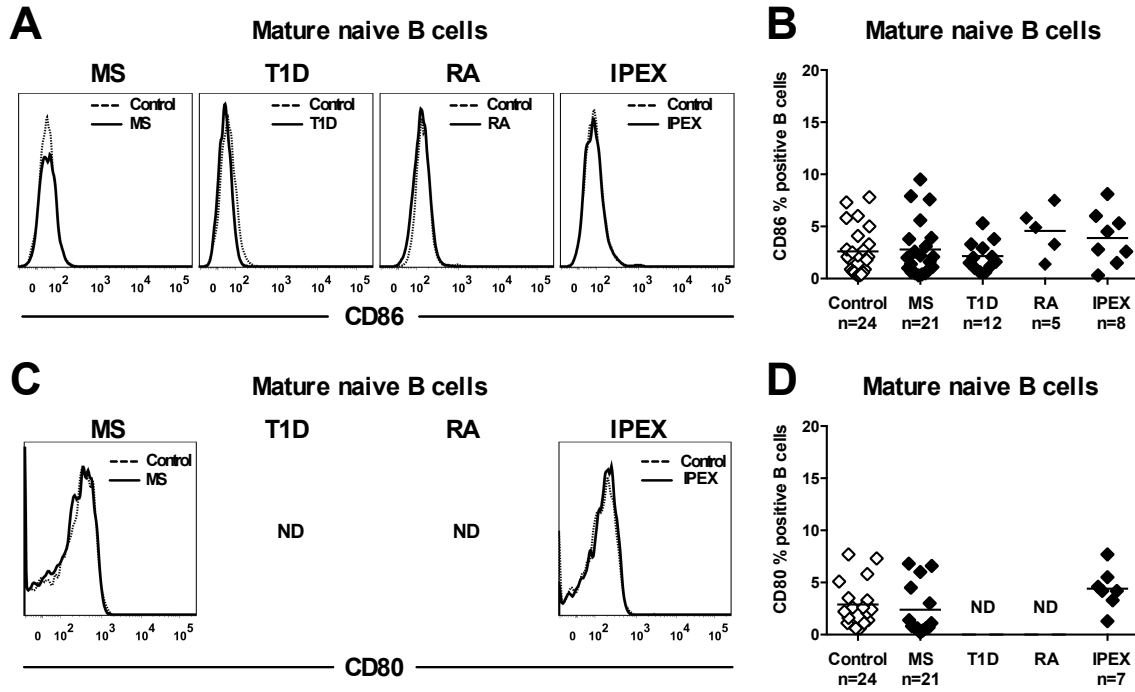

**Supplemental Figure 3. Normal expression of CD80 and CD86 on mature naive B cells from MS, T1D, RA and IPEX patients. (A)** Representative CD86 and **(C)** CD80 expression on CD19+CD27- naive B cells and their percentage **(B, D)** in patients with MS, T1D, RA and IPEX (bold line) compared to healthy donors (dotted line). Statistical differences are indicated when significant.

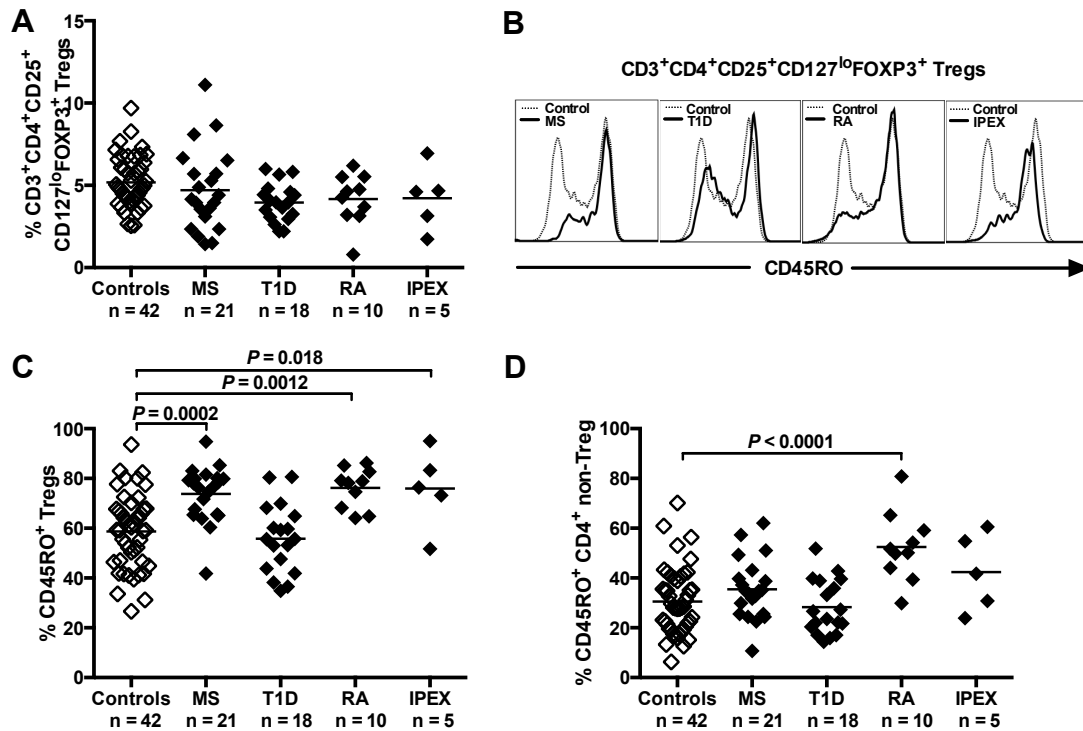

**Supplemental Figure 4. Increased frequency of CD45RO<sup>+</sup> memory Tregs in MS and RA patients.** (A) Normal CD3<sup>+</sup>CD4<sup>+</sup>CD25<sup>+</sup>CD127<sup>lo</sup>FOXP3<sup>+</sup> Treg cell frequencies in MS, T1D, RA and IPEX patients compared to healthy donors. (B) Representative CD45RO expression on Tregs from MS, T1D, RA and IPEX patients (bold line) compared to healthy donors (dotted line). (C) The increased frequency of CD45RO<sup>+</sup> memory Tregs in MS and RA patients is similar to that of IPEX patients and is not observed in CD3<sup>+</sup>CD4<sup>+</sup>CD25<sup>-</sup>CD127<sup>+</sup>FOXP3<sup>-</sup> non-Tregs (D). Statistical differences are indicated when significant.

**Supplemental Table 1. Characteristics of MS patients and healthy donors**

|                            | <b>MS01</b>    | <b>MS02</b>         | <b>MS04</b>              | <b>MS05</b>                   | <b>MS07</b> | <b>MS23</b>              | <b>MS31</b>                        |
|----------------------------|----------------|---------------------|--------------------------|-------------------------------|-------------|--------------------------|------------------------------------|
| <b>Age (y)</b>             | 56             | 34                  | 33                       | 28                            | 48          | 17                       | 24                                 |
| <b>Gender</b>              | Female         | Female              | Female                   | Female                        | Male        | Female                   | Male                               |
| <b>Time from diagnosis</b> | 6 mo           | New onset           | 1 mo                     | New onset                     | New onset   | New onset                | New onset                          |
| <b>Clinical symptoms</b>   | Optic neuritis | Dizziness, numbness | Optic neuritis, numbness | Dizziness, tinnitus, numbness | Numbness    | Optic neuritis, tingling | Vertigo, urinary frequency, ataxia |

|                | <b>HD01</b> | <b>HD02</b> | <b>HD03</b> | <b>HD08</b> | <b>HD09</b> | <b>HD10</b> | <b>HD11</b> | <b>HD15</b> | <b>HD27</b> | <b>HD28</b> | <b>HD29</b> |
|----------------|-------------|-------------|-------------|-------------|-------------|-------------|-------------|-------------|-------------|-------------|-------------|
| <b>Age (y)</b> | 23          | 24          | 23          | 14          | 5           | 36          | 24          | 53          | 25          | 50          | 29          |
| <b>Gender</b>  | Male        | Female      | Female      | Female      | Female      | Male        | Female      | Female      | Female      | Male        | Male        |

**Supplemental Table 2. Repertoire and reactivity of antibodies from new emigrant B cells of MS01**

| Ig         | HEAVY  |      |    |    |                         | Length | LIGHT |    |             |        | REACTIVITY |      |          |
|------------|--------|------|----|----|-------------------------|--------|-------|----|-------------|--------|------------|------|----------|
|            | VH     | D    | RF | JH | CDR3 (aa)               |        | Vk    | Jk | CDR3 (aa)   | Length | Poly       | Hep2 | Staining |
| neMS01 03  | 3-64   | 3-22 | 2  | 3  | YYALHAFDI               | 9      | 1-6   | 4  | LQDYNYPPLT  | 9      | +          | -    | -        |
| neMS01 06  | 1-69   | 6-19 | 2  | 5  | ERMGNLTSSGWTNWFDP       | 16     | 1-39  | 5  | QQSYSTPQIT  | 10     | +          | +    | -        |
| neMS01 09  | 3-15   | 1-26 | 2  | 4  | DRSGSYRPWGY             | 11     | 2-28  | 2  | MQALQTPPYT  | 10     | -          | -    | -        |
| neMS01 10  | 4-39   | 2-15 | 3  | 3  | HGIWLVAATPOSPGNAFDI     | 19     | 1-5   | 2  | QQYNSYPMYT  | 10     | +          | +    | -        |
| neMS01 11# | 4-34   | /    | /  | 4  | GINGVNFYD               | 9      | 3-20  | 1  | QQYGSSPWT   | 9      |            |      |          |
| neMS01 14# | 3-9    | 3-3  | 3  | 5  | ATTGITIFGVVENWFDP       | 17     | 1-39  | 4  | QQSYSTPLT   | 9      |            |      |          |
| neMS01 16# | 4-31   | 3-9  | 2  | 4  | FATYDILTGYSV            | 12     | 1-5   | 2  | QQYNSSPYT   | 9      |            |      |          |
| neMS01 18  | 3-23   | 1-26 | 2  | 4  | GSGSPSYHFDY             | 12     | 3-20  | 2  | QQYGSSLYT   | 9      | -          | -    | -        |
| neMS01 20  | 3-33   | 4-23 | 3  | 6  | VRTGVSYYYMDV            | 12     | 1-39  | 2  | QQSYSTPYT   | 9      |            |      |          |
| neMS01 21  | 3-48   | /    | /  | 4  | DAMTCLDY                | 8      | 3-20  | 4  | QQYGSSPALT  | 10     | -          | +    | -        |
| neMS01 24  | 3-43   | /    | /  | 4  | DSPAVGWKYFDY            | 13     | 3-15  | 4  | QQYNNWPPLT  | 10     | -          | -    | -        |
| neMS01 26  | 3-30-3 | 6-13 | 3  | 4  | ATIAAAVDY               | 9      | 1-39  | 2  | QQSYSTPNT   | 9      | -          | +    | c        |
| neMS01 30  | 3-15   | /    | /  | 6  | DWVHDSPIYYGMDV          | 15     | 1-39  | 4  | QQSYSTLT    | 8      | -          | -    | -        |
| neMS01 34  | 4-34   | 1-1  | 3  | 5  | GWSTGTRGAWFDP           | 14     | 1-39  | 1  | QQSYSTPWT   | 9      | -          | +    | -        |
| neMS01 39  | 3-7    | 4-17 | 2  | 4  | VPYGDYLYFDY             | 12     | 4-1   | 2  | QQYYSTPPT   | 9      | -          | -    | -        |
| neMS01 41  | 3-7    | 6-13 | 3  | 4  | GGAAAGTGRYCVFDY         | 15     | 1-5   | 3  | QQYNSYSGVT  | 10     | -          | +    | -        |
| neMS01 45  | 3-9    | 6-19 | 3  | 4  | DPSIAVSLPDY             | 11     | 3-20  | 4  | QQYGSSPLT   | 9      | -          | -    | -        |
| neMS01 46  | 3-9    | 3-22 | 3  | 3  | DLGTSQPLIVAGDAFDI       | 17     | 3-11  | 4  | QQRSNWPPRLT | 11     | -          | -    | -        |
| neMS01 48  | 1-69   | 2-2  | 2  | 5  | DLPPPLGYCSSTSCYSRDNWFDP | 24     | 4-1   | 2  | QQYYSTPYT   | 9      |            |      |          |
| neMS01 05  |        |      |    |    |                         |        | 3-20  | 3  | QQYGSSPGVFT | 11     |            |      |          |
| neMS01 17  |        |      |    |    |                         |        | 4-1   | 4  | QQYYSTPPT   | 9      |            |      |          |
| neMS01 22  |        |      |    |    |                         |        | 1-39  | 2  | QQSYSTPPT   | 9      |            |      |          |
| neMS01 27  |        |      |    |    |                         |        | 3-20  | 1  | QQYGSSPWT   | 9      |            |      |          |
| neMS01 28  |        |      |    |    |                         |        | 1-39  | 2  | QQSYSTPYT   | 9      |            |      |          |
| neMS01 43  |        |      |    |    |                         |        | 2-23  | 2  | CSYAGSSTLV  | 10     |            |      |          |
| neMS01 01  | 3-7    | /    | /  | 4  | AGLLRGGDYFDY            | 12     | 3-21  | 2  | QVWDSSTLHLV | 11     | -          | -    | -        |
| neMS01 04  | 4-59   | 6-13 | 3  | 6  | DGGTIAAAGYYYYGMDV       | 18     | 1-40  | 3  | QSYDSSLGWW  | 11     | +          | +    | -        |
| neMS01 07  | 3-20   | 3-9  | 2  | 4  | KRPNYDILTGYYHEYFDY      | 19     | 2-14  | 2  | SSYTSSTTVV  | 10     | +          | -    | -        |
| neMS01 08  | 4-59   | 5-5  | 1  | 6  | DRVQLWTRHYYYYGMDV       | 18     | 2-14  | 2  | SSYTSSTL    | 9      | +          | +    | -        |
| neMS01 13  | 3-30-3 | 6-13 | 3  | 5  | DLILRPPIAAAGTWFDP       | 17     | 2-11  | 1  | CSYAGSYTYV  | 10     | +          | +    | -        |
| neMS01 14# |        |      |    |    | see kappa               |        | 3-10  | 3  | YSTDSSGNPLV | 11     |            |      |          |
| neMS01 16  |        |      |    |    | see kappa               |        | 1-47  | 7  | AAWDDSLSGAV | 11     | +          | -    | -        |
| neMS01 18# |        |      |    |    | see kappa               |        | 3-27  | 1  | YSAADNNYV   | 9      |            |      |          |
| neMS01 19  | 4-34   | 5-12 | 3  | 6  | SPVVATITIAPIHHYYMDV     | 19     | 1-51  | 2  | GTWDSSLSAVV | 11     | +          | +    | -        |
| neMS01 20  |        |      |    |    | see kappa               |        | 3-21  | 3  | QVWDSSTLHPV | 11     | -          | +    | -        |
| neMS01 23  | 3-23   | 1-26 | 3  | 3  | EDGGIVEAGAFDI           | 13     | 3-25  | 3  | QSADSSGTYRV | 11     | -          | -    | -        |
| neMS01 25  | 3-30-3 | 5-5  | 3  | 3  | DLVDATGGLRWVFDI         | 18     | 2-23  | 3  | CSYAGSSTLV  | 10     | -          | -    | -        |
| neMS01 33# | 1-69   | 3-22 | 2  | 4  | DYYDSSGYVYFDY           | 13     | 3-25  | 2  | QSADSSGTYVV | 11     |            |      |          |
| neMS01 36  | 3-43   | /    | /  | 6  | AKDTFERPRQYYGMDV        | 17     | 2-14  | 1  | SSYTSSTEV   | 10     | -          | -    | -        |
| neMS01 38# | 3-15   | 4-4  | 3  | 6  | DRDQVTTLTYGMDV          | 15     | 7-43  | 2  | LLYYGGAQLV  | 10     |            |      |          |
| neMS01 40  | 5-51   | 5-5  | 2  | 5  | HESYSYGRINWFDP          | 14     | 2-14  | 2  | SSYTSSTLV   | 10     | -          | -    | -        |
| neMS01 44  | 4-34   | 2-2  | 3  | 3  | VFVPAIIYAFDI            | 13     | 2-14  | 2  | SSYTSSTKV   | 10     | -          | -    | -        |
| neMS01 47  | 3-15   | 3-22 | 2  | 4  | EYYDSSGQIDY             | 11     | 2-14  | 2  | SSYTSSTLKV  | 11     | -          | -    | -        |

RF, reading frame; #, antibody failed to be expressed; -, non-reactive; +, reactive;

c, cytoplasmic staining; N, nuclear staining

**Supplemental Table 3. Repertoire and reactivity of antibodies from new emigrant B cells of MS02**

| Ig         | HEAVY  |               |     |    |                       | LIGHT  |      |    |               | REACTIVITY |      |      |          |
|------------|--------|---------------|-----|----|-----------------------|--------|------|----|---------------|------------|------|------|----------|
|            | VH     | D             | RF  | JH | CDR3 (aa)             | Length | Vk   | Jk | CDR3 (aa)     | Length     | Poly | Hep2 | Staining |
| neMS02 2   | 3-21   | 6-6           | 2   | 4  | EKRGSSSLDY            | 10     | 1-5  | 1  | QQYNSYSWT     | 9          | -    | +    | -        |
| neMS02 4   | 1-18   | 4-17/<br>3-16 | 3/3 | 4  | DPTTVTYLGGGDFDY       | 15     | 3-20 | 5  | QQYGSSPVT     | 9          | -    | +    | -        |
| neMS02 8   | 4-30   | 3-22          | 2   | 5  | GRRDYDSSGSSWFDP       | 16     | 1-39 | 1  | QQSYSTPWT     | 9          | -    | +    | N        |
| neMS02 13# | 1-46   | 2-8           | 2   | 6  | EGDCTNGVCSHPRSYGMDV   | 20     | 3-20 | 4  | QQYGSSPLT     | 9          | -    | -    | -        |
| neMS02 17  | 3-66   | 3-22          | 3   | 3  | HIFGITMIVVDDAFDI      | 17     | 1-39 | 4  | QQSYSTPPT     | 9          | -    | -    | -        |
| neMS02 23  | 4-39   | 6-19          | 1   | 6  | IPLPSQWLGYGMDV        | 16     | 3-20 | 4  | QQYGSS        | 6          | +    | +    | c        |
| neMS02 26  | 1-69   | 4-23          | 2   | 2  | GGGDYGGNPPWYFDL       | 15     | 1-8  | 2  | QQYYSYPPT     | 9          | -    | +    | -        |
| neMS02 29# | 1-18   | 2-15          | 3   | 6  | HQVVVAATPYGMDV        | 15     | 3-15 | 1  | QQYNNWFWT     | 9          | -    | -    | -        |
| neMS02 30  | 1-2    | 3-22          | 2   | 4  | DTYYDSSGSSGWFYD       | 16     | 3-11 | 4  | QQRSNWPLT     | 9          | -    | -    | -        |
| neMS02 33  | 4-61   | 6-13          | 3   | 4  | SGALAAAYLGVDY         | 13     | 2-28 | 1  | MQALQTPPWT    | 10         | -    | -    | -        |
| neMS02 40  | 5-a    | 3-10          | 2   | 5  | HGPGALYGSPTSTNWFDP    | 20     | 3-15 | 2  | QQYNNWPLYT    | 11         | -    | +    | -        |
| neMS02 42  | 3-48   | 2-8           | 3   | 3  | TAKYIVLMVYHPPGAFDI    | 18     | 1-5  | 2  | QQYNSYSYS     | 9          | -    | +    | -        |
| neMS02 43  | 3-21   | 6-19          | 3   | 4  | DMTAVAGTEYFDY         | 13     | 1-39 | 1  | QQSYSTPRT     | 9          | -    | -    | -        |
| neMS02 46  | 3-30   | 1-7           | 1   | 4  | PASLEPSYFDY           | 12     | 1-5  | 4  | QQYNSYPFT     | 9          | -    | -    | -        |
| neMS02 47  | 3-15   | 6-19          | 2   | 1  | DLNSSGWAEPQYFQH       | 15     | 3-15 | 1  | QQYNNWPRT     | 9          | -    | -    | -        |
| neMS02 48  | 3-33   | 3-16          | 1   | 4  | SAGEGWYDY             | 9      | 3-15 | 2  | QQYNNWPPNT    | 10         | -    | -    | -        |
| neMS02 9   | 3-23   | 2-2           | 3   | 6  | DLVVVVPAIPLRYGMDV     | 18     |      |    |               |            |      |      |          |
| neMS02 21  | 3-23   | 3-22          | 2   | 2  | DIRGDYDSSGPVSPPNWYFDL | 22     |      |    |               |            |      |      |          |
|            | VH     | D             | RF  | JH | CDR3 (aa)             | Length | Vk   | Jk | CDR3 (aa)     | Length     | Poly | Hep2 | Staining |
| neMS02 11  | 4-30-4 | 3-22          | 2   | 3  | LYYYDLPDAFDI          | 12     | 2-23 | 3  | CSYAGSRV      | 8          | -    | -    | -        |
| neMS02 12  | 3-48   | 4-23          | 3   | 4  | EKTVAYYFDY            | 10     | 3-21 | 3  | QVWDSSSDHWV   | 11         | -    | +    | -        |
| neMS02 14# | 1-2    | 6-13          | 3   | 4  | AIAAAAPERLNY          | 12     | 2-14 | 2  | SSYTSSTQV     | 10         | -    | -    | -        |
| neMS02 18  | 3-30   | 1-7           | 1   | 4  | PASLEPSYFDY           | 12     | 2-23 | 3  | CSYAGRWW      | 8          | -    | -    | -        |
| neMS02 19  | 3-30   | 5-5           | 2   | 4  | DGVRGYSYGYVGY         | 13     | 1-51 | 3  | GTWDSLSVRV    | 11         | -    | -    | -        |
| neMS02 20  | 3-21   | /             | /   | 2  | DSGHWYFDL             | 9      | 2-14 | 2  | SSYTSSTLVV    | 11         | -    | +    | -        |
| neMS02 25  | 3-21   | 5-5           | 3   | 5  | DRAVDTAGFDP           | 11     | 3-21 | 3  | QVWDSSSDHSNWW | 13         | -    | -    | -        |
| neMS02 28  | 3-49   | 6-6           | 2   | 5  | TYSSPNWFDP            | 11     | 3-28 | 3  | QVWDSSSDHVV   | 11         | -    | -    | -        |
| neMS02 32  | 3-30   | /             | /   | 4  | GPSLEA                | 6      | 2-11 | 3  | CSYAGSYT      | 8          | -    | +    | -        |
| neMS02 38  | 3-7    | /             | /   | 4  | PSLVNHRGYFDY          | 13     | 3-21 | 2  | QVWDSSSDPGVV  | 12         | -    | -    | -        |

RF, reading frame; #, antibody failed to be expressed; -, non-reactive; +, reactive;

c, cytoplasmic staining; N, nuclear staining



**Supplemental Table 4. Repertoire and reactivity of antibodies from new emigrant B cells of MS04**

| Ig         | HEAVY  |      |    |    |                          | LIGHT  |                |                |              | REACTIVITY |      |      |          |
|------------|--------|------|----|----|--------------------------|--------|----------------|----------------|--------------|------------|------|------|----------|
|            | VH     | D    | RF | JH | CDR3 (aa)                | Length | V <sub>k</sub> | J <sub>k</sub> | CDR3 (aa)    | Length     | Poly | Hep2 | Staining |
| neMS04 1   | 4-59   | 1-26 | 3  | 6  | GGVGATTSYGGMDV           | 14     | 3-20           | 5              | QQYGSSPIT    | 9          | -    | -    | -        |
| neMS04 3#  | 3-30   | 7-27 | 2  | 3  | EGAAWGAFDI               | 10     | 3-11           | 2              | QQRSNWPPGCS  | 11         |      |      |          |
| neMS04 4   | 3-23   | 1-26 | 2  | 3  | ALKNGPNSGSDEGAFDI        | 17     | 1-8            | 1              | QQYYSYPRT    | 9          | -    | -    | -        |
| neMS04 5   | 4-61   | 2-2  | 2  | 6  | LIGGTRSTRYRYYYMDV        | 19     | 1-8            | 1              | QQYYSYPWT    | 9          | +    | +    | c        |
| neMS04 7#  | 3-30-3 | 1-26 | 3  | 4  | DHTVGATTWGIPPSGY         | 16     | 1-39           | 5              | QQYSTPRIT    | 10         |      |      |          |
| neMS04 13  | 3-30   | 3-10 | 3  | 4  | GASITMVRGVITDYFDY        | 17     | 3-11           | 4              | QQRSNWPPPLT  | 10         | -    | -    | -        |
| neMS04 15  | 4-59   | 3-3  | 3  | 3  | DIRIFGVVHDAFDI           | 14     | 3-20           | 2              | QQYGSSPYS    | 9          | -    | -    | -        |
| neMS04 16  | 3-15   | /    | /  | 4  | DHGDPKAGY                | 9      | 1-39           | 1              | QQYSTPRIT    | 9          | -    | -    | -        |
| neMS04 17  | 3-23   | 3-3  | 3  | 4  | SGGLVTIFGVVIMPYYFDY      | 19     | 2-29           | 1              | MQGIHLPT     | 9          | -    | +    | N        |
| neMS04 18  | 3-23   | /    | /  | 4  | SYGFDY                   | 6      | 1-6            | 1              | LQDYNYPWT    | 9          | -    | -    | c        |
| neMS04 19  | 4-34   | 3-16 | 2  | 4  | DRSYDYVWGSYPSRCDY        | 18     | 1-27           | 3              | QKYNAPRT     | 9          | +    | +    | c        |
| neMS04 20# | 1-58   | 6-6  | 2  | 6  | VTIEPEYSSFARYYYMDV       | 20     | 3-20           | 1              | QQYGSSPQT    | 9          |      |      |          |
| neMS04 22  | 3-23   | /    | /  | 6  | PPFIYYYYMDV              | 12     | 3-20           | 3              | QQYGSSPLT    | 9          | +    | +    | c        |
| neMS04 25  | 3-33   | 5-12 | 3  | 6  | DKDIVATTAMYYYYMDV        | 19     | 3-20           | 1              | QQSGT        | 5          | -    | +    | -        |
| neMS04 26  | 1-2    | 3-16 | 3  | 6  | DLQALMITFGGPIDYYGMDV     | 20     | 1-39           | 3              | QQSYSTSFT    | 9          | -    | -    | c        |
| neMS04 27# | 4-61   | 6-6  | 3  | 6  | VLGGIAARYYYMDV           | 17     | 3-15           | 1              | QQYNNWPPGET  | 11         |      |      |          |
| neMS04 30  | 4-59   | 3-3  | 3  | 4  | STIFGVVTPPGY             | 12     | 1-5            | 1              | QQYNSYWT     | 8          | +    | +    | -        |
| neMS04 31  | 3-33   | 3-10 | 3  | 4  | EHVVRGAVLGY              | 11     | 1-33           | 3              | QQYDNLPS     | 8          | -    | -    | -        |
| neMS04 33  | 4-34   | 2-15 | 3  | 5  | GNKGDLDIVVVAATRVVDYNWFDP | 24     | 1-39           | 1              | QQSYSTPST    | 9          | -    | +    | -        |
| neMS04 35  | 3-23   | 3-10 | 2  | 4  | DMRHGSGSSIDY             | 12     | 1-16           | 3              | QQYNSYPFT    | 9          | -    | -    | -        |
| neMS04 36  | 3-15   | 3-3  | 2  | 5  | DITRPDFWGSYYMS           | 14     | 1-8            | 1              | QQYYSYPPT    | 9          | -    | +    | -        |
| neMS04 39# | 5-51   | 3-10 | 3  | 6  | GVRGVKTRYYYGMDV          | 17     | 1-5            | 1              | QQYNSYPWT    | 9          |      |      |          |
| neMS04 41  | 1-2    | 2-8  | 3  | 6  | GSLMVYAIPIHYGMDV         | 17     | 2-28           | 2              | MQALQTPYS    | 9          | -    | -    | -        |
| neMS04 42  | 4-61   | 2-2  | 2  | 5  | LTLGYCSP                 | 8      | 3-20           | 5              | QQYGSSPFT    | 9          | -    | +    | c        |
| neMS04 44  | 3-23   | 3-22 | 2  | 3  | VRKEDDSSDRVDAFDI         | 17     | 1-5            | 1              | QQYNSYSWT    | 9          | -    | -    | -        |
| neMS04 32  | 3-11   | /    | /  | 3  | GTPGGGAAFDI              | 11     |                |                |              |            |      |      |          |
| neMS04 23  |        |      |    |    |                          |        | 1-39           | 2              | QQSYSTPPS    | 9          |      |      |          |
| neMS04 45  |        |      |    |    |                          |        | 1-27           | 4              | QKYNAPFT     | 9          |      |      |          |
|            | VH     | D    | RF | JH | CDR3 (aa)                | Length | V <sub>k</sub> | J <sub>k</sub> | CDR3 (aa)    | Length     | Poly | Hep2 | Staining |
| neMS04 6   | 4-34   | 5-24 | 2  | 4  | RGPRDGYNYFFDY            | 13     | 2-8            | 2              | SSYAGSNNHVV  | 11         | -    | +    | -        |
| neMS04 7#  |        |      |    |    | see kappa                |        | 2-14           | 2              | SSYTSSTLVV   | 11         |      |      |          |
| neMS04 8#  | 5-51   | 4-4  | 2  | 6  | TQISDYSTPYYYMDV          | 17     | 2-14           | 3              | SSYTSSTLWV   | 11         |      |      |          |
| neMS04 9   | 4-59   | 2-2  | 3  | 6  | VIVVPAAIYYMDV            | 14     | 1-44           | 1              | AAWDDSLNGPV  | 11         | -    | -    | -        |
| neMS04 10  | 3-7    | 5-5  | 1  | 4  | KGFRIQLWSDY              | 11     | 2-14           | 3              | SSYTSSTRV    | 10         | +    | +    | c+N      |
| neMS04 12  | 3-30   | 2-15 | 3  | 6  | DPVVAATLYYYMDV           | 15     | 1-51           | 1              | GTWDSLSAYV   | 11         | -    | -    | -        |
| neMS04 14  | 3-9    | 2-2  | 2  | 6  | DIGYCSSTSCYSAVSYYYGMDV   | 24     | 1-44           | 2              | AAWDDSLNGVV  | 11         | -    | -    | -        |
| neMS04 22  |        |      |    |    | see kappa                |        | 1-51           | 3              | GTWDSLSVNWV  | 12         | +    | +    | c        |
| neMS04 24  | 3-33   | 1-26 | 1  | 2  | DKGQWELLPDWYFDL          | 15     | 2-14           | 3              | SSYTSSTRV    | 10         | -    | +    | -        |
| neMS04 25# |        |      |    |    | see kappa                |        | 1-47           | 2              | AAWDDSLSGDVV | 12         |      |      |          |
| neMS04 28  | 3-21   | 3-3  | 2  | 4  | DKSHFWSGYPPTAFDY         | 16     | 2-23           | 2              | CSYAGSSTYVV  | 11         | +    | +    | c        |
| neMS04 34  | 4-61   | 3-16 | 2  | 3  | APDNVWGSYRYTGAFDI        | 17     | 2-18           | 2              | SSYTSSTLV    | 10         | -    | -    | -        |
| neMS04 40  | 3-30   | 2-21 | 3  | 4  | PHRRVVVIAIPLDY           | 14     | 3-1            | 2              | QAWDSSTVV    | 9          | -    | +    | c+N      |
| neMS04 45# |        |      |    |    | see kappa                |        | 1-40           | 3              | QSYDSSLSAV   | 10         |      |      |          |
| neMS04 46  | 3-23   | /    | /  | 4  | EGESSLRYFDY              | 11     | 3-25           | 2              | QSADSSGTV    | 9          | -    | -    | -        |
| neMS04 48  | 3-23   | 6-19 | 3  | 4  | PIAVAGPIDY               | 10     | 1-47           | 3              | AAWDDSLSGRV  | 11         | -    | +    | c        |
| neMS04 37  |        |      |    |    |                          |        | 3-21           | 2              | QVWDDSSDHVV  | 11         |      |      |          |

RF, reading frame; #, antibody failed to be expressed; -, non-reactive; +, reactive;

c, cytoplasmic staining; N, nuclear staining

**Supplemental Table 5. Repertoire and reactivity of antibodies from new emigrant B cells of MS05**

| Ig         | HEAVY  |      |    |    |                           | LIGHT  |      |    |               |        | REACTIVITY |      |          |
|------------|--------|------|----|----|---------------------------|--------|------|----|---------------|--------|------------|------|----------|
|            | VH     | D    | RF | JH | CDR3 (aa)                 | Length | Vk   | Jk | CDR3 (aa)     | Length | Poly       | Hep2 | Staining |
| neMS05 01# | 1-69   | 3-22 | 2  | 6  | AYYDSSGYLYGMDV            | 14     | 3-20 | 1  | QQYGSSPRT     | 9      |            |      |          |
| neMS05 02  | 3-7    | 3-22 | 2  | 5  | EQVYYDSSGYYYV             | 14     | 1-5  | 1  | QQYNSYSQT     | 9      | -          |      |          |
| neMS05 05  | 4-34   | 2-2  | 3  | 4  | VEGVVPAIAARPLDY           | 17     | 3-20 | 4  | QQYGSSPSLT    | 10     | -          |      |          |
| neMS05 07  | 4-39   | /    | /  | 3  | RSENGSLEWGASSDAFDI        | 18     | 1-39 | 4  | QQYSTPLLT     | 10     | -          |      |          |
| neMS05 08  | 3-11   | 6-6  | 2  | 4  | GYSSSSY                   | 7      | 1-5  | 2  | QQYNSYSRT     | 9      | -          |      |          |
| neMS05 09  | 3-11   | 2-2  | 2  | 6  | AGYCSSTSCYEGYYYYGMDV      | 21     | 3-20 | 3  | QQYGSSPT      | 8      | -          |      |          |
| neMS05 11  | 3-73   | 3-3  | 3  | 6  | SWPTGGVVIPLDYGGMDV        | 19     | 3-11 | 4  | QQGSNWL       | 8      | +          |      |          |
| neMS05 12  | 4-59   | 2-8  | 2  | 3  | GGVFNDAFI                 | 9      | 3-20 | 4  | QQYGSSTL      | 8      | -          |      |          |
| neMS05 14  | 3-30-3 | 3-10 | 2  | 4  | DLRAERYGSGTGQFDY          | 16     | 1-39 | 3  | QQYSTPW       | 9      | -          |      |          |
| neMS05 15  | 3-30   | 6-13 | 3  | 6  | DFVGIAAAEYYYYGMDV         | 17     | 1-39 | 1  | QQYSTPLA      | 9      | -          |      |          |
| neMS05 16  | 3-15   | 2-2  | 3  | 6  | DELGVGVPAAIYYGMDV         | 18     | 4-1  | 1  | QQYSTPRT      | 9      | -          |      |          |
| neMS05 18  | 3-30-3 | 3-3  | 3  | 4  | DNGITIFGVVTPPGY           | 15     | 3-15 | 1  | QQYNNWPWT     | 9      | -          |      |          |
| neMS05 19# | 3-30-3 | 3-16 | 2  | 4  | DNPMYDYYVWGSYRQDY         | 16     | 1-5  | 1  | QQYNSYSWT     | 9      |            |      |          |
| neMS05 23  | 3-73   | 3-3  | 3  | 6  | SWPTGGVVIPLDYGGMDV        | 19     | 2-28 | 1  | MQALQTPGT     | 9      | -          |      |          |
| neMS05 24  | 4-31   | 5-12 | 2  | 4  | DLDSGYDFHLLPDY            | 15     | 1-17 | 1  | LQHNSYPRT     | 9      | -          |      |          |
| neMS05 26  | 4-59   | 2-2  | 1  | 5  | GAIGRVHVP TAEVGNQLLVGWFD  | 25     | 3-11 | 5  | QQRSNWPPIT    | 10     | -          |      |          |
| neMS05 27  | 4-4    | 2-2  | 2  | 6  | ANKMIDRGYFYYGMDV          | 17     | 1-5  | 1  | QQYNSSPWT     | 9      | -          |      |          |
| neMS05 28  | 3-23   | 6-13 | 3  | 4  | DSGGPFAAAGTGDVVFDY        | 18     | 1-8  | 2  | QQYYSYPY      | 9      | -          |      |          |
| neMS05 30  | 3-48   | 6-6  | 2  | 3  | IKTQTVTYSSSSPDAFDI        | 18     | 1-39 | 2  | QQYSTLPWYT    | 11     | -          |      |          |
| neMS05 36  | 4-30-4 | 3-3  | 3  | 5  | SRGTIFGPFDP               | 12     | 1-5  | 2  | QQYNSSLMYT    | 10     | -          |      |          |
| neMS05 38  | 4-31   | 1-7  | 2  | 4  | EESGTTAFDY                | 10     | 3-20 | 1  | QQYGSSPRT     | 9      |            |      |          |
| neMS05 40  | 4-59   | 6-13 | 2  | 5  | HGSSSSWLLNWFDP            | 14     | 1-5  | 1  | QQYNSYPRT     | 9      |            |      |          |
| neMS05 41  | 3-21   | 1-26 | 3  | 4  | VGIVGATDY                 | 9      | 3-20 | 2  | QQYGSSPVT     | 9      |            |      |          |
| neMS05 43  | 3-15   | 6-13 | 2  | 5  | DWYSSSWT                  | 8      | 1-5  | 1  | QQYNSYSRT     | 9      |            |      |          |
| neMS05 44  | 4-30-2 | 3-16 | 2  | 3  | AGAYDYVWGSIIYPVADAFDI     | 21     | 4-1  | 1  | QQYSTPQT      | 9      |            |      |          |
| neMS05 48  | 1-69   | 5-5  | 3  | 6  | DPTYPTAMAKYYYYGMDV        | 18     | 3-11 | 1  | QQRSNWPRGWT   | 11     |            |      |          |
| neMS05 32  | 1-69   | 3-3  | 2  | 3  | IWREGYDFWGSYYVSPDAFDI     | 22     |      |    |               |        |            |      |          |
| neMS05 45  | 3-30   | 6-19 | 1  | 4  | DLGGQWLPTTIDY             | 14     |      |    |               |        |            |      |          |
| neMS05 04  | 3-7    | 6-13 | 2  | 2  | EEWYSSSSWYWFYDL           | 15     |      |    |               |        |            |      |          |
| neMS05 17  | 3-21   | 1-26 | 3  | 4  | VPIVGATSVY                | 10     |      |    |               |        |            |      |          |
|            | VH     | D    | RF | JH | CDR3 (aa)                 | Length | Vk   | Jk | CDR3 (aa)     | Length | Poly       | Hep2 | Staining |
| neMS05 03  | 1-18   | 6-19 | 2  | 4  | EGVSGWFEVAYFDY            | 15     | 2-14 | 1  | SSYTSSSTRV    | 10     | -          |      |          |
| neMS05 06  | 3-23   | 6-19 | 3  | 4  | NNLRTGIAVAATDY            | 14     | 2-8  | 1  | SSYAGSNNLGV   | 11     | -          |      |          |
| neMS05 13  | 3-30-3 | 2-21 | 2  | 6  | DPPPVAVYCGGDCYSGYYYYGMDV  | 23     | 3-21 | 2  | QVWDSSSDRVV   | 11     | -          |      |          |
| neMS05 20  | 1-2    | 3-3  | 2  | 5  | DSIGNYDFWGSYPNNWFDP       | 19     | 3-21 | 3  | QVWPGV        | 6      | -          |      |          |
| neMS05 21  | 3-15   | 1-26 | 1  | 6  | LPMGRELSPDYGGMDV          | 17     | 3-10 | 2  | YSTDSSGNHGV   | 11     | -          |      |          |
| neMS05 33# | 3-33   | 4-17 | 2  | 4  | DFNDYGDYVGGPFYD           | 14     | 3-21 | 3  | QVWDSSSDHVV   | 11     |            |      |          |
| neMS05 34  | 3-53   | 5-12 | 2  | 6  | DRRGYSYDLSYGMDV           | 16     | 1-40 | 1  | QSYDSSLSPPYV  | 11     | -          |      |          |
| neMS05 37  | 4-31   | /    | /  | 3  | GVAVLDAFDI                | 10     | 3-1  | 2  | QAWDSSTDVV    | 10     | -          |      |          |
| neMS05 38  |        |      |    |    | see kappa                 |        | 2-8  | 2  | SSYAGSNTNVV   | 11     |            |      |          |
| neMS05 39  | 3-33   | 3-22 | 2  | 3  | DPRNYDSSGYFRRSGYAFDI      | 21     | 3-1  | 2  | QAWDSSTVV     | 9      | -          |      |          |
| neMS05 46  | 3-23   | 7-27 | 2  | 4  | EDWGRYY                   | 7      | 2-14 | 3  | SSYTSSSTTGV   | 11     |            |      |          |
| neMS05 47  | 3-11   | 2-15 | 2  | 6  | FFAERIGYCSGGSCRNPDDYGGMDV | 27     | 2-14 | 1  | SSYTSSSTPPVYV | 13     |            |      |          |

RF, reading frame; #, antibody failed to be expressed; -, non-reactive; +, reactive;

c, cytoplasmic staining; N, nuclear staining

**Supplemental Table 6. Repertoire and reactivity of antibodies from new emigrant B cells of MS07**

| Ig         | HEAVY |      |    |    |                       | Length | LIGHT |    |              |        | REACTIVITY |      |          |
|------------|-------|------|----|----|-----------------------|--------|-------|----|--------------|--------|------------|------|----------|
|            | VH    | D    | RF | JH | CDR3 (aa)             |        | Vk    | Jk | CDR3 (aa)    | Length | Poly       | Hep2 | Staining |
| neMS07 1   | 4-4   | /    | /  | 4  | VGV                   | 3      | 1-39  | 1  | QQSYSTPRT    | 9      | -          |      |          |
| neMS07 2#  | 3-30  | 5-5  | 3  | 6  | ENVDTAKEDYYYYGMDV     | 17     | 1-27  | 1  | QKYNAPQT     | 9      |            |      |          |
| neMS07 4   | 4-39  | 3-22 | 2  | 4  | RGYYDSSGFFDY          | 12     | 3-15  | 4  | QQYNNWLT     | 8      | -          |      |          |
| neMS07 9#  | 5-51  | /    | /  | 6  | STPPRAPYYGMDV         | 14     | 4-1   | 2  | QQYSTPPT     | 9      |            |      |          |
| neMS07 11  | 4-34  | 3-10 | 3  | 6  | HRTRGVKYDYGGMDV       | 16     | 1-5   | 1  | QQYNSYSRT    | 9      | -          |      |          |
| neMS07 19  | 4-34  | /    | /  | 6  | GGGVEYYGMDV           | 12     | 2-28  | 2  | MQALQTPKYT   | 10     | -          |      |          |
| neMS07 22  | 4-4   | 2-2  | 2  | 6  | FGVSCSSTSCYGGYYYYGMDV | 22     | 3-20  | 1  | QQYSSPRT     | 9      | -          |      |          |
| neMS07 23  | 3-21  | 6-19 | 3  | 6  | DPMEIPIAVKPLAHPGYWFDP | 21     | 4-1   | 2  | QQYSTPCS     | 9      | -          |      |          |
| neMS07 29  | 4-31  | /    | /  | 6  | APAYYYGMDV            | 10     | 3-15  | 4  | QQYNNWPLT    | 9      | -          |      |          |
| neMS07 30# | 5-a   | 5-5  | 2  | 4  | YLGYSYGYGY            | 10     | 3-20  | 2  | QQYSSPGCS    | 10     |            |      |          |
| neMS07 32  | 3-15  | 3-10 | 3  | 6  | GVTMVRGAETAYYYYGMDV   | 20     | 3-15  | 4  | QQYNNWPLT    | 9      | -          |      |          |
| neMS07 34  | 3-53  | 4-23 | 2  | 3  | DAGRHYGGNPGDAFDI      | 16     | 1-5   | 2  | QQYNSWIS     | 8      | +          |      |          |
| neMS07 39  | 3-53  | /    | /  | 3  | EGHGVHGMAYAFDI        | 13     | 3-11  | 4  | QQRSNWPS     | 8      | -          |      |          |
| neMS07 41  | 3-33  | 2-15 | 3  | 6  | DLAATQDYYYGMDV        | 14     | 3-11  | 5  | QQRSNWPIT    | 9      |            |      |          |
| neMS07 43  | 3-48  | 4-4  | 3  | 4  | EGSVTTLDY             | 9      | 3-11  | 4  | QQRSNWPLT    | 9      | -          |      |          |
| neMS07 48  | 4-4   | 5-12 | 2  | 4  | VPMEVSRGYDYGYFDY      | 17     | 1-27  | 1  | QKYNAPRT     | 9      | -          |      |          |
| neMS07 25  | 3-74  | 2-15 | 2  | 6  | AQGYCSGGSCYDYGGMDV    | 19     |       |    |              |        |            |      |          |
| neMS07 27  | 3-33  | 6-13 | 3  | 6  | EMGIAAAGASGYGGMDV     | 19     |       |    |              |        |            |      |          |
| neMS07 3   | 4-34  | 3-22 | 2  | 3  | MYYDSSGYYVSGPDAFDI    | 20     |       |    |              |        |            |      |          |
| neMS07 21  | 3-23  | /    | /  | 4  | DRRGGFYD              | 8      |       |    |              |        |            |      |          |
| neMS07 13  |       |      |    |    |                       |        | 3-11  | 2  | QQRSNWPPYT   | 10     |            |      |          |
| neMS07 14  |       |      |    |    |                       |        | 3-15  | 1  | QQYNNWPRGT   | 10     |            |      |          |
| neMS07 31  |       |      |    |    |                       |        | 1-39  | 5  | QQSYTPRAT    | 10     |            |      |          |
|            | VH    | D    | RF | JH | CDR3 (aa)             | Length | Vl    | Jl | CDR3 (aa)    | Length | Poly       | Hep2 | Staining |
| neMS07 5   | 1-69  | 3-22 | 2  | 4  | DPELAYDSSGYSLLY       | 16     | 1-51  | 2  | GTWDSLSAGV   | 11     |            |      |          |
| neMS07 7   | 3-53  | 6-19 | 2  | 4  | HSSGLGYFVDY           | 11     | 2-11  | 1  | CSYAGSYTYV   | 10     | -          |      |          |
| neMS07 8   | 4-61  | 4-17 | 2  | 4  | ASDYGDGPGVGFYD        | 13     | 1-47  | 1  | AAWDDSLSGRYV | 12     | -          |      |          |
| neMS07 10  | 4-39  | 2-2  | 3  | 3  | LNIVVPAIHHAFDI        | 16     | 2-23  | 3  | CSYAGSSTWV   | 10     | -          |      |          |
| neMS07 16  | 1-18  | /    | /  | 5  | LYIRHNWFDP            | 10     | 2-11  | 1  | CSYAGSPYV    | 9      | -          |      |          |
| neMS07 17  | 4-4   | 6-19 | 2  | 4  | DGIDEYSSGWYGSGLDY     | 17     | 1-44  | 3  | AAWDDSLNLRV  | 11     | -          |      |          |
| neMS07 26  | 4-59  | 3-22 | 2  | 4  | LYYDSSGYYHFYD         | 14     | 3-1   | 2  | QAWDSSLV     | 8      | -          |      |          |
| neMS07 33  | 4-4   | 3-22 | 2  | 3  | VSDYDSSGYHDAFDI       | 15     | 3-25  | 2  | QSADSSGTYV   | 11     | -          |      |          |
| neMS07 35  | 3-33  | 6-19 | 3  | 6  | NRVAVAEYYYGMDV        | 15     | 1-51  | 2  | GTWDSLSAGV   | 11     | -          |      |          |
| neMS07 36  | 4-39  | 6-19 | 2  | 4  | LDSSGWYVGY            | 10     | 3-21  | 3  | QVWDSSTDHQV  | 11     | -          |      |          |
| neMS07 37  | 1-69  | 6-19 | 2  | 4  | EPGYSSGWEKFDY         | 13     | 2-14  | 1  | SSYTSSSTNV   | 10     | -          |      |          |
| neMS07 40  | 3-7   | 6-19 | 2  | 4  | DVGSSGWYFVYD          | 12     | 1-40  | 3  | QSYDSSLGGSV  | 11     | -          |      |          |
| neMS07 44  | 1-69  | 4-23 | 3  | 6  | NLRFSSSHSVGYGGMDV     | 20     | 2-14  | 2  | SSYTSSSTYV   | 11     | -          |      |          |
| neMS07 45  | 3-21  | 3-22 | 2  | 4  | DYYDSSGYYRHFDY        | 14     | 1-51  | 2  | GTWDSLSAVV   | 11     | -          |      |          |
| neMS07 47  | 1-24  | 1-7  | 3  | 6  | TDGTGITGTPYYYYGMDV    | 18     | 2-11  | 2  | CSYAGSYTVV   | 10     | -          |      |          |
| neMS07 20  |       |      |    |    |                       |        | 1-47  | 3  | AAWDDSLSGWV  | 11     |            |      |          |
| neMS07 25  |       |      |    |    |                       |        | 3-1   | 2  | QAWDSSTVV    | 9      |            |      |          |
| neMS07 42  |       |      |    |    |                       |        | 2-14  | 2  | SSYTSSSTLVV  | 11     |            |      |          |

RF, reading frame; #, antibody failed to be expressed; -, non-reactive; +, reactive;

c, cytoplasmic staining; N, nuclear staining

**Supplemental Table 7. Repertoire and reactivity of antibodies from new emigrant B cells of MS23**

| Ig         | HEAVY |      |    |    |                        | LIGHT  |       |    |               | REACTIVITY |      |      |          |
|------------|-------|------|----|----|------------------------|--------|-------|----|---------------|------------|------|------|----------|
|            | VH    | D    | RF | JH | CDR3 (aa)              | Length | Vk    | Jk | CDR3 (aa)     | Length     | Poly | Hep2 | Staining |
| neMS23 5   | 3-23  | /    | /  | 2  | GWDAYWYFDL             | 10     | 1-39  | 1  | QQSYSTPPT     | 9          | -    |      |          |
| neMS23 6   | 3-33  | 5-12 | 2  | 6  | DADSGYDSATYYYYGMDV     | 19     | 1-16  | 2  | QQYNSYPYT     | 9          | -    |      |          |
| neMS23 9   | 3-11  | /    | /  | 6  | GSLTYYYYYGMDV          | 12     | 1-16  | 4  | QQYNSYPLT     | 9          | -    |      |          |
| neMS23 10  | 4-34  | 6-13 | 2  | 6  | SSSWHPYYYGMDV          | 13     | 3-11  | 4  | QQRSNWRLT     | 9          | -    |      |          |
| neMS23 12  | 3-48  | 3-16 | 3  | 3  | IMITFGGVIWDAFDI        | 15     | 1-5   | 2  | QQYNSYTYT     | 9          | -    |      |          |
| neMS23 14  | 3-13  | 6-13 | 2  | 4  | SYSSSWYDY              | 9      | 3-15  | 2  | QQYNNWPSYT    | 10         | -    |      |          |
| neMS23 15  | 1-45  | 1-20 | 2  | 6  | SEGWNDPYYYYGMDV        | 16     | 3-20  | 1  | QQGT          | 4          |      |      |          |
| neMS23 17  | 4-34  | 3-10 | 2  | 4  | SQGVYGSFSFDY           | 12     | 3-15  | 2  | QQYNNWPPYT    | 10         | -    |      |          |
| neMS23 20  | 4-39  | 6-19 | 3  | 5  | GGVAGTEDWFDP           | 12     | 3-11  | 4  | QQRSNWLT      | 8          | -    |      |          |
| neMS23 27  | 4-34  | 6-13 | 1  | 5  | GLEQQLVRVQEYNWFDP      | 17     | 3D-20 | 5  | QQYGSSPPIT    | 10         | -    |      |          |
| neMS23 32  | 4-4   | /    | /  | 4  | RDPCCFDY               | 7      | 2-28  | 3  | MQALQTPFT     | 9          | -    |      |          |
| neMS23 33  | 1-18  | /    | /  | 5  | EKQLSGWFPD             | 10     | 4-1   | 3  | QQYYSTPRT     | 9          | -    |      |          |
| neMS23 35# | 1-24  | 4-4  | 3  | 4  | SATVTPPYFDY            | 12     | 4-1   | 3  | QQYYSTPPT     | 9          |      |      |          |
| neMS23 41  | 3-21  | 3-10 | 1  | 6  | DRGELLWFGEYYYYGMDV     | 21     | 2-29  | 4  | MQGIHLPRT     | 9          | -    |      |          |
| neMS23 43  | 3-15  | 5-5  | 1  | 4  | DRVPLWPRVY             | 11     | 3-20  | 2  | QQYGSSPYT     | 9          | -    |      |          |
| neMS23 44  | 4-4   | 4-17 | 2  | 4  | RADDYGDYTPDY           | 12     | 1-16  | 5  | QQYNSYPIT     | 9          | -    |      |          |
| neMS23 48  | 3-13  | 6-19 | 1  | 4  | VASSGWNDY              | 9      | 4-1   | 2  | QQYYSTPNT     | 9          | -    |      |          |
| neMS23 1   | 4-59  | /    | /  | 6  | LGLVAPLYYYYGMDV        | 15     |       |    |               |            |      |      |          |
| neMS23 2   | 3-49  | 4-17 | 2  | 3  | DGDYQDAFDI             | 10     |       |    |               |            |      |      |          |
| neMS23 4   | 4-59  | 3-10 | 1  | 6  | AGIGESIGGYGMDV         | 14     |       |    |               |            |      |      |          |
| neMS07 8   | 4-59  | 6-13 | 3  | 3  | PGIAAAGTLAFDI          | 13     |       |    |               |            |      |      |          |
| neMS23 16  | 4-31  | 6-13 | 2  | 4  | GVSSWLYIDY             | 10     |       |    |               |            |      |      |          |
| neMS23 18  | 3-48  | 6-13 | 2  | 4  | ERVSSSPGVFDY           | 13     |       |    |               |            |      |      |          |
| neMS23 39  | 3-43  | 2-15 | 2  | 6  | DIEVRYCSGGSCYSSYHYGMDV | 22     |       |    |               |            |      |      |          |
| neMS23 40  | 4-34  | 6-19 | 3  | 4  | CAVAGTSVLFDY           | 12     |       |    |               |            |      |      |          |
| neMS23 45  | 4-31  | 3-10 | 2  | 5  | GFYYGSGVGFDP           | 14     |       |    |               |            |      |      |          |
| neMS23 46  | 3-30  | 3-10 | 1  | 4  | GAGLWFGELLDY           | 12     |       |    |               |            |      |      |          |
|            | VH    | D    | RF | JH | CDR3 (aa)              | Length | Vl    | Jl | CDR3 (aa)     | Length     | Poly | Hep2 | Staining |
| neMS23 11# | 3-30  | 3-22 | 2  | 4  | DLPPYYDSSGYLENRWSFDY   | 21     | 2-14  | 3  | SSYTSSTLV     | 10         |      |      |          |
| neMS23 13  | 4-39  | 3-3  | 3  | 4  | FGVTKTPDY              | 10     | 2-23  | 2  | CSYAGSSTYVV   | 11         | -    |      |          |
| neMS23 15  |       |      |    |    | see kappa              |        | 2-8   | 2  | SSYAGSNNVV    | 10         |      |      |          |
| neMS23 19# | 4-4   | 4-17 | 2  | 2  | DRRYGDLPYWYFDL         | 15     | 2-8   | 3  | SSYAGSNGV     | 9          |      |      |          |
| neMS23 22  | 3-33  | 6-19 | 2  | 4  | GSSGWYGEFFDY           | 12     | 1-40  | 1  | QSYDSSLGPPYV  | 12         | -    |      |          |
| neMS23 23  | 4-b   | /    | /  | 6  | DGEGLYYYGMDV           | 13     | 3-21  | 2  | QVWDSSSDHRV   | 11         | -    |      |          |
| neMS23 25  | 3-23  | 6-6  | 3  | 6  | GVIAARPDYYYYGMDV       | 16     | 3-1   | 2  | QAWDSSIV      | 9          |      |      |          |
| neMS23 29  | 4-31  | 3-10 | 2  | 5  | EHYYGSGSYRWFDP         | 16     | 1-40  | 7  | QSYDSSLGFAV   | 12         | -    |      |          |
| neMS23 31  | 4-4   | 2-2  | 2  | 6  | ICSSTSCYYYGMDV         | 14     | 1-44  | 2  | AAWDDSLNGHV   | 12         | -    |      |          |
| neMS23 36  | 1-2   | 2-15 | 3  | 4  | GGMDIVVVAATGVDY        | 16     | 2-14  | 3  | SSYTSSTLV     | 10         | -    |      |          |
| neMS23 38  | 4-59  | 2-8  | 2  | 4  | LGGAYFDY               | 9      | 1-40  | 1  | QSYDSSLGYYV   | 11         | -    |      |          |
| neMS23 42  | 4-31  | 4-17 | 2  | 4  | GIPTNYGDPYFDY          | 14     | 1-51  | 2  | GTWDSSL SAVV  | 11         | -    |      |          |
| neMS23 7   |       |      |    |    |                        |        | 1-51  | 2  | GTWDSSL SAGVV | 12         |      |      |          |
| neMS23 26  |       |      |    |    |                        |        | 1-44  | 2  | AAWDDSLNGLV   | 11         |      |      |          |

RF, reading frame; #, antibody failed to be expressed; -, non-reactive; +, reactive;

c, cytoplasmic staining; N, nuclear staining

**Supplemental Table 8. Repertoire and reactivity of antibodies from new emigrant B cells of MS31**

| Ig         | HEAVY |      |    |    |                          | Length | LIGHT |    |              |        | REACTIVITY |      |          |
|------------|-------|------|----|----|--------------------------|--------|-------|----|--------------|--------|------------|------|----------|
|            | VH    | D    | RF | JH | CDR3 (aa)                |        | Vκ    | Jκ | CDR3 (aa)    | Length | Poly       | Hep2 | Staining |
| neMS31 01  | 1-69  | 3-22 | 2  | 5  | DPTYYDSSGYNQYNWFDP       | 19     | 1-12  | 4  | QQANSFTLT    | 8      | -          |      |          |
| neMS31 03  | 4-34  | 2-8  | 2  | 5  | PKAGHCTNGVCRGGHWFDP      | 19     | 4-1   | 1  | QQYSTPMT     | 9      | -          |      |          |
| neMS31 05# | 3-23  | 3-10 | 2  | 5  | DLNDYYGSGDWFDP           | 14     | 1-39  | 5  | QQSYSTPF     | 8      |            |      |          |
| neMS31 07  | 4-34  | 6-19 | 3  | 6  | DRWGGGIAVAGDGSYYYYGMDV   | 23     | 1-5   | 2  | QQYNSYPYT    | 9      | -          |      |          |
| neMS31 09  | 3-23  | 3-22 | 2  | 4  | RRERNYYDSSGYYGY          | 16     | 1-5   | 2  | QQYNSYSGT    | 9      | -          |      |          |
| neMS31 10  | 4-34  | 6-19 | 3  | 3  | GARIAVAGFDAFDI           | 14     | 3-20  | 1  | QQYGSSPRT    | 9      | -          |      |          |
| neMS31 11  | 4-34  | 5-12 | 1  | 4  | SMRLRCIDY                | 9      | 3-15  | 1  | QQYNNWPGT    | 9      | -          |      |          |
| neMS31 12  | 5-51  | 3-10 | 2  | 4  | EFYYGSGSYSDFDY           | 14     | 3-20  | 5  | QQYGSSPQT    | 9      | -          |      |          |
| neMS31 17# | 1-3   | 2-15 | 3  | 4  | VGWVAIDY                 | 9      | 1-9   | 3  | QQLNSYAFT    | 9      |            |      |          |
| neMS31 21  | 1-69  | 3-3  | 3  | 5  | DREKGITIFGVVTPEGGNWFDP   | 22     | 1-33  | 3  | QQYDNLPSFT   | 10     | -          |      |          |
| neMS31 23# | 4-4   | 3-22 | 2  | 6  | DDAASTYYDSSGPTYYYYYGMDV  | 23     | 3-15  | 4  | QQYNNWPLT    | 9      |            |      |          |
| neMS31 34  | 3-9   | 2-2  | 3  | 4  | GDIVVPAAYFDY             | 13     | 3-11  | 4  | QQRSNWPLT    | 9      | -          |      |          |
| neMS31 35  | 3-23  | 4-23 | 2  | 4  | SSYGAFSGY                | 9      | 1-5   | 1  | QQYNSYSPT    | 9      | -          |      |          |
| neMS31 42  | 4-59  | 1-1  | 1  | 6  | VQLVDYYYYGMDV            | 13     | 3-20  | 4  | QQYGSSPLT    | 9      | -          |      |          |
| neMS31 43  | 4-34  | 6-13 | 2  | 6  | TTGSSWYYYGMDV            | 13     | 4-1   | 2  | QQYYSTPRS    | 9      | -          |      |          |
| neMS31 44  | 4-34  | 1-26 | 3  | 4  | GIVGATVDY                | 9      | 3-20  | 1  | QQYGSSPRT    | 9      | -          |      |          |
| neMS31 45  | 1-3   | 3-22 | 2  | 4  | VGGYYDSSGSDY             | 14     | 1-16  | 4  | QQYNSYPLT    | 9      | -          |      |          |
| neMS31 14  | 5-51  | 4-17 | 3  | 4  | HLGTVTTPDY               | 10     |       |    |              |        |            |      |          |
| neMS31 16  | 4-39  | 6-13 | 3  | 3  | PMTISPPIAAAGTGFAFDI      | 19     |       |    |              |        |            |      |          |
| neMS31 47  | 1-69  | 6-13 | 3  | 4  | SLSAGPIYFDY              | 11     |       |    |              |        |            |      |          |
| neMS31 28  | 3-23  | 7-27 | 2  | 4  | DSKPNWGGGQKGFYD          | 15     |       |    |              |        |            |      |          |
| neMS31 39  | 4-59  | 5-5  | 1  | 2  | APWIQLWYFDL              | 12     |       |    |              |        |            |      |          |
| neMS31 02  |       |      |    |    |                          |        | 1-5   | 1  | QQYNSYSWT    | 9      |            |      |          |
|            | VH    | D    | RF | JH | CDR3 (aa)                | Length | Vλ    | Jλ | CDR3 (aa)    | Length | Poly       | Hep2 | Staining |
| neMS31 13  | 4-39  | 2-15 | 2  | 6  | WGGYCSCGSCYTRRKDLFALFMDV | 24     | 2-14  | 3  | SSYTSSSTLV   | 10     | -          |      |          |
| neMS31 15  | 3-33  | /    | /  | 6  | DNRVTRPYYYYYGMDV         | 16     | 1-51  | 2  | GTWDSSLSAVV  | 11     | -          |      |          |
| neMS31 18  | 3-23  | 3-10 | 1  | 6  | SVLLWFGEYPYGMVDV         | 15     | 2-8   | 2  | SSYAGSNNLV   | 10     | +          |      |          |
| neMS31 19  | 3-33  | 2-8  | 2  | 4  | EPYCTNGVCFLDY            | 13     | 3-21  | 1  | QVWDSSSDHHYV | 12     | -          |      |          |
| neMS31 22# | 3-33  | 5-5  | 2  | 6  | DPIRGGYGPYYGMDV          | 15     | 7-46  | 2  | LLSYSGARPVV  | 11     |            |      |          |
| neMS31 30  | 4-39  | 5-5  | 2  | 4  | ERGYSYGYLSRDFDY          | 15     | 2-14  | 2  | SSYTSSSNVV   | 10     | -          |      |          |
| neMS31 31# | 5-51  | 6-13 | 3  | 3  | HSPFGIAAAGISDAFDI        | 17     | 3-1   | 2  | QAWDSSTAIV   | 10     |            |      |          |
| neMS31 32  | 4-34  | 3-3  | 2  | 4  | GGSGRSGVPLDFDY           | 14     | 1-40  | 2  | QSYDSSLGSLVV | 12     | -          |      |          |
| neMS31 36  | 3-15  | /    | /  | 5  | DQAGFDP                  | 7      | 3-21  | 2  | QVWDSSSDHVV  | 11     | -          |      |          |
| neMS31 38  | 3-48  | 2-8  | 3  | 6  | DHLLMVYASSYYYGMDV        | 17     | 3-1   | 2  | QAWDSSTVV    | 9      | -          |      |          |
| neMS31 46  | 3-33  | 2-15 | 2  | 5  | ERCSGGSCYSFWFDP          | 15     | 3-21  | 2  | QVWDSSSDHVV  | 11     | -          |      |          |
| neMS31 48  | 3-23  | 5-24 | 2  | 2  | AAAPEGDGYNFYWYFDL        | 17     | 3-21  | 2  | QVWDSSSDLVV  | 11     | -          |      |          |

RF, reading frame; #, antibody failed to be expressed; -, non-reactive; +, reactive;

c, cytoplasmic staining; N, nuclear staining

**Supplemental Table 9. Repertoire and reactivity of antibodies from mature naive B cells of MS01**

| Ig        | HEAVY  |      |    |    |                       | LIGHT  |      |    |               | REACTIVITY |      |      |          |
|-----------|--------|------|----|----|-----------------------|--------|------|----|---------------|------------|------|------|----------|
|           | VH     | D    | RF | JH | CDR3 (aa)             | Length | Vk   | Jk | CDR3 (aa)     | Length     | Poly | Hep2 | Staining |
| mMS01 54  | 3-48   | 2-15 | 2  | 6  | DGLRYCSGGSCYSYDYGMDV  | 19     | 1-12 | 4  | QQANSFPRT     | 9          | -    | -    | -        |
| mMS01 55  | 4-4    | 6-19 | 2  | 4  | VGGYHSSGWTFDY         | 13     | 1-39 | 1  | QQSYSTPWT     | 9          | -    | -    | -        |
| mMS01 56  | 3-48   | 1-7  | 3  | 6  | TSVIGTGTTFAGPEYYYYMDV | 21     | 1-12 | 2  | QQANSFPYT     | 9          | -    | -    | -        |
| mMS01 63  | 1-18   | 6-13 | 3  | 1  | VRAAAPGAYFQH          | 12     | 3-15 | 3  | QQYNNWPPGIT   | 11         | -    | +    | -        |
| mMS01 65# | 3-48   | /    | /  | 3  | PLEHDAFDI             | 9      | 4-1  | 2  | QQYYSTPIT     | 9          |      |      |          |
| mMS01 68  | 1-2    | 2-2  | 2  | 6  | KGYCSSTSCYFADYYYYGMDV | 20     | 1-39 | 2  | QQSYSTPHT     | 9          | +    | +    | c        |
| mMS01 69  | 1-69   | 3-22 | 2  | 6  | VQDDSSGNHYRMDV        | 14     | 4-1  | 1  | QQYYSTSWT     | 9          | -    | -    | c        |
| mMS01 71  | 3-66   | 2-2  | 2  | 6  | DHCSSTSCCPLDYYYYYGMDV | 21     | 3-20 | 2  | QQYGSSPQYT    | 10         | -    | -    | -        |
| mMS01 74  | 3-21   | 5-5  | 2  | 4  | QDSYGFFDY             | 10     | 4-1  | 1  | QQYYSTPWT     | 9          | -    | -    | -        |
| mMS01 77  | 4-34   | 3-10 | 2  | 5  | GSPTYYYGSGSYNWFDV     | 17     | 1-39 | 4  | QQSYSTLLT     | 9          | -    | +    | -        |
| mMS01 78  | 4-59   | 5-24 | 2  | 6  | SSGDGYIYTPSNYYYYMDV   | 19     | 1-8  | 1  | QQYYSYPWT     | 9          | -    | +    | -        |
| mMS01 81  | 3-23   | 5-24 | 3  | 4  | TNKEMATIFGFLFDY       | 15     | 3-11 | 2  | QQRSNWPEYT    | 11         | -    | -    | c+N      |
| mMS01 83  | 1-2    | 5-5  | 3  | 5  | DGDTAMDH              | 8      | 4-1  | 4  | QQYYSTPPT     | 9          | -    | -    | -        |
| mMS01 89  | 3-11   | 6-13 | 3  | 6  | FLSPGIAAGTLNYYYYGMDV  | 22     | 1-39 | 5  | QQSYSTPIT     | 9          | -    | +    | c        |
| mMS01 90# | 1-69   | 1-1  | 1  | 4  | ELEPRPGGVY            | 10     | 2-28 | 2  | MQALQTPNT     | 9          |      |      |          |
| mMS01 91  | 1-69   | 5-12 | 2  | 6  | DRHSGYDSNIYYYYGMDV    | 20     | 1-5  | 1  | QQYNSYPWT     | 9          | -    | +    | -        |
| mMS01 95  | 4-59   | 7-27 | 1  | 6  | LLGPHYYYYYMDV         | 12     | 1-39 | 1  | QQSYSTPQT     | 9          | -    | +    | -        |
| mMS01 96  | 3-49   | 3-22 | 2  | 4  | APGLYYDSSGVGDY        | 15     | 3-15 | 1  | QQYNNWLTWT    | 10         | -    | +    | -        |
| mMS01 85  |        |      |    |    |                       |        | 3-11 | 4  | QQRSNWRALT    | 10         |      |      |          |
|           | VH     | D    | RF | JH | CDR3 (aa)             | Length | Vl   | Jl | CDR3 (aa)     | Length     | Poly | Hep2 | Staining |
| mMS01 49  | 3-30   | 3-22 | 3  | 4  | TMSFDY                | 6      | 3-25 | 2  | QSADSSGTFVV   | 11         | +    | +    | c        |
| mMS01 52  | 3-72   | 3-22 | 2  | 5  | AMTDYYDSSGYWFDP       | 15     | 3-1  | 2  | QAWDSSIVV     | 9          | -    | -    | -        |
| mMS01 53  | 4-59   | 3-3  | 2  | 6  | VAHYDFWSGQSYIGYYYYMDV | 22     | 1-44 | 3  | AAWDDSLNGPNWV | 13         | +    | +    | -        |
| mMS01 59  | 3-30   | 3-3  | 2  | 6  | AMYYDFWSGSYSDYYYYGMDV | 20     | 2-8  | 2  | SSYAGSKEI     | 9          | -    | -    | -        |
| mMS01 64  | 4-4    | 6-13 | 3  | 4  | DLGAAAGGFDY           | 11     | 3-1  | 3  | QAWDSSSTAV    | 9          | -    | -    | -        |
| mMS01 72  | 4-30-4 | 4-17 | 2  | 4  | VSGYGGNFDY            | 10     | 2-8  | 2  | SSYAGSNNLV    | 10         | -    | -    | -        |
| mMS01 73  | 3-48   | 1-26 | 2  | 6  | PQGVDSGSYGWVYYYYGMDV  | 20     | 3-21 | 2  | QVWDDSSDHGV   | 11         | -    | +    | -        |
| mMS01 75  | 3-64   | 3-22 | 2  | 4  | EVGGYYDSSGYNTDYFDY    | 21     | 1-40 | 2  | QSYDSSLGSGV   | 12         | -    | -    | -        |
| mMS01 76  | 4-4    | 3-10 | 2  | 5  | EGSDYGSYLVLDKGFDP     | 21     | 1-44 | 2  | AAWDDSLNGQVV  | 12         | -    | -    | -        |
| mMS01 79  | 3-23   | 6-19 | 2  | 6  | KEGGGWYGLDYMDV        | 15     | 1-40 | 3  | QSYDSSLGSGV   | 11         | -    | -    | c        |
| mMS01 82  | 3-23   | 6-6  | 3  | 4  | VGAARAFDY             | 9      | 1-44 | 3  | AAWDDSLNGWV   | 11         | -    | -    | c        |
| mMS01 87  | 3-21   | 6-19 | 2  | 3  | DWEYSGSDAFDI          | 13     | 1-40 | 2  | QSYDSSLGSGNVV | 13         | -    | -    | -        |
| mMS01 88  | 1-24   | 3-22 | 2  | 4  | DLYYDSSGYRLKYFDY      | 18     | 2-8  | 2  | SSYAGSVVV     | 9          | -    | -    | -        |
| mMS01 89  |        |      |    |    | see kappa             |        | 1-47 | 3  | AAWDDSLSL     | 9          | +    | +    | -        |
| mMS01 94  | 1-46   | 3-10 | 2  | 5  | ENYGSYSYNGGDWFDP      | 18     | 1-44 | 2  | AAWDDSLNGPV   | 11         | -    | -    | -        |

RF, reading frame; #, antibody failed to be expressed; -, non-reactive; +, reactive;

c, cytoplasmic staining; N, nuclear staining

**Supplemental Table 10. Repertoire and reactivity of antibodies from mature naive B cells of MS02**

| Ig        | HEAVY  |      |    |    |                      | Length | LIGHT          |                |               |        | REACTIVITY |      |          |
|-----------|--------|------|----|----|----------------------|--------|----------------|----------------|---------------|--------|------------|------|----------|
|           | VH     | D    | RF | JH | CDR3 (aa)            |        | V <sub>k</sub> | J <sub>k</sub> | CDR3 (aa)     | Length | Poly       | Hep2 | Staining |
| mMS02 49  | 3-21   | 7-27 | 2  | 5  | SDWGWFDP             | 8      | 4-1            | 4              | QQYYSTPPT     | 9      | -          | -    | c        |
| mMS02 51  | 3-23   | 6-19 | 2  | 4  | ASSGWYGGGYFDY        | 13     | 1-39           | 2              | QQSYSTPDS     | 9      | -          | +    | c        |
| mMS02 52  | 3-30-3 | 1-26 | 2  | 4  | GYSGSHDGAIDY         | 13     | 1-5            | 1              | QQYNSYSPWT    | 10     | -          | -    | -        |
| mMS02 56  | 1-46   | 5-5  | 3  | 6  | VASVAGGRNTAVDV       | 14     | 2-28           | 4              | MQALQTPPT     | 9      | -          | -    | -        |
| mMS02 57  | 3-66   | 4-17 | 2  | 6  | GVRLYGDYNYGMDV       | 14     | 2-28           | 4              | MQALQPLT      | 9      | -          | -    | -        |
| mMS02 58  | 3-23   | 3-22 | 2  | 4  | ERRGTYDSSGYYYGPGCFDY | 21     | 4-1            | 4              | QQYYSTPLT     | 9      | -          | +    | -        |
| mMS02 59  | 4-39   | 6-6  | 2  | 6  | KVGSSEMDV            | 11     | 1-5            | 1              | QQYNSYST      | 8      | -          | -    | -        |
| mMS02 61  | 4-4    | 3-3  | 2  | 3  | QNYDFWSGPGAFDI       | 14     | 3-15           | 1              | QQYNNWPPWT    | 10     | -          | -    | c        |
| mMS02 65# | 1-2    | 6-19 | 1  | 4  | RGLGKQWLWGLSAFDY     | 17     | 4-1            | 4              | QQYYSTLTLT    | 10     |            |      |          |
| mMS02 67  | 3-66   | 3-10 | 1  | 5  | EGYERFGELSAL         | 12     | 3-11           | 1              | QQRNSWT       | 8      | -          | -    | -        |
| mMS02 68  | 4-30-2 | 3-10 | 3  | 6  | VRGAPWGYYYGMDV       | 14     | 3-15           | 4              | QQYNNWLGT     | 9      | +          | +    | c        |
| mMS02 70  | 3-23   | 3-16 | 2  | 6  | DQSSTGGGSPGENYYGMDV  | 19     | 1-39           | 2              | QQSYSTPYT     | 9      | -          | -    | -        |
| mMS02 71  | 4-39   | 5-5  | 3  | 4  | ELLDTAMVTLPHYFDY     | 16     | 3-15           | 4              | QQYNNWPHT     | 9      | -          | -    | -        |
| mMS02 72# | 5-a    | /    | /  | 6  | RVSKGWDYYYGMDV       | 14     | 3-20           | 4              | QQYGSSPLT     | 9      |            |      |          |
| mMS02 73  | 4-4    | 6-19 | 2  | 4  | RSGPFYD              | 7      | 1-39           | 4              | QQSYSTPSLT    | 10     | -          | -    | -        |
| mMS02 74  | 3-30-3 | 6-13 | 2  | 6  | EESSSWYRGYYYGMDV     | 16     | 1-39           | 2              | QQSYSTPPGS    | 10     | -          | +    | -        |
| mMS02 75# | 1-69   | 1-26 | 3  | 2  | DGSIVGATLQKLRIFDL    | 17     | 3-20           | 2              | QQYGSSPSGS    | 10     |            |      |          |
| mMS02 79  | 3-21   | 6-19 | 2  | 4  | DLLLEGWYGPQGGY       | 14     | 3-20           | 1              | QQYGSSPS      | 8      | -          | +    | -        |
| mMS02 82  | 4-39   | 3-3  | 3  | 3  | GHGSRITIFGVIMDDAFDI  | 20     | 3-20           | 1              | QQYGSSLT      | 8      | +          | +    | -        |
| mMS02 84# | 4-34   | /    | /  | 4  | APSVFLRAPRTRSFYD     | 16     | 3-15           | 1              | QQYNNWLTWT    | 10     |            |      |          |
| mMS02 86  | 1-18   | 2-15 | 2  | 5  | ACAFSGSGSCAKPRGP     | 16     | 1-5            | 2              | QQYNSYMYT     | 9      | +          | +    | c+N      |
| mMS02 89  | 1-18   | 2-2  | 3  | 6  | DGPYIVVPAIIFPMDV     | 17     | 3-15           | 1              | QQYNNWRGT     | 9      | -          | +    | -        |
| mMS02 90  | 3-20   | 6-19 | 3  | 5  | DALIAVAGPYNWFDV      | 15     | 1-12           | 2              | QQANSFPYS     | 9      | -          | -    | -        |
| mMS02 92# | 1-18   | /    | /  | 3  | DNPPYDRYGLDAFDI      | 15     | 3-11           | 3              | QQRSNWPSIFT   | 11     |            |      |          |
| mMS02 94  | 3-7    | 2-15 | 2  | 4  | SSYSHY               | 6      | 1-5            | 1              | QQYNSYSQT     | 9      | -          | +    | -        |
| mMS02 64  | 1-18   | 3-22 | 2  | 4  | AGFYDSSGYYSLGY       | 14     |                |                |               |        |            |      |          |
| mMS02 69  | 1-18   | 6-19 | 3  | 4  | DAEVGIAVAGKGGHFGY    | 17     |                |                |               |        |            |      |          |
| mMS02 55  |        |      |    |    |                      |        | 1-9            | 3              | QQLNSYPF      | 8      |            |      |          |
|           | VH     | D    | RF | JH | CDR3 (aa)            | Length | V <sub>k</sub> | J <sub>k</sub> | CDR3 (aa)     | Length | Poly       | Hep2 | Staining |
| mMS02 50# | 1-2    | 1-7  | 3  | 6  | AVGITGTTTTYYYGMDV    | 17     | 2-11           | 1              | CSYAGSYTFV    | 10     |            |      |          |
| mMS02 53  | 1-69   | 3-10 | 2  | 4  | DGVVDYGGSGYYAGDYFDY  | 19     | 2-11           | 1              | CSYAGSYTYV    | 10     | +          | +    | c        |
| mMS02 54  | 4-59   | 1-1  | 2  | 4  | ARVNWLDLY            | 9      | 3-21           | 2              | QVWDSSSDHPGVV | 13     | -          | -    | -        |
| mMS02 60  | 4-39   | 6-19 | 3  | 5  | AEIAVAGTVGWFDV       | 14     | 1-51           | 2              | GTWDSLSAV     | 10     | -          | -    | -        |
| mMS02 63  | 3-21   | 1-26 | 3  | 3  | EEMGATGNAFDI         | 12     | 1-44           | 1              | AAWDDSLNAHYV  | 12     | -          | -    | -        |
| mMS02 76# | 3-23   | 2-21 | 2  | 4  | PWGFDPGGFDY          | 11     | 3-1            | 3              | QAWDSSTGWV    | 10     |            |      |          |
| mMS02 78  | 5-a    | /    | /  | 3  | HSFKLGSTNAFDI        | 13     | 2-14           | 3              | SSYTSSSTWV    | 10     | -          | -    | -        |
| mMS02 84  |        |      |    |    | see kappa            |        | 1-44           | 3              | AAWDDSLNGRWV  | 12     | -          | -    | -        |
| mMS02 87  | 4-30-4 | 6-19 | 2  | 4  | EPNSSGFNLYYFDY       | 14     | 1-40           | 1              | QSYDSSLGYYV   | 11     | -          | -    | -        |
| mMS02 95  | 4-39   | /    | /  | 4  | MAFPYYFDY            | 9      | 2-14           | 3              | SSYTSSSTLGV   | 11     |            |      |          |
| mMS02 96  |        |      |    |    |                      |        | 3-21           | 3              | QVWDSSSDSWV   | 11     |            |      |          |

RF, reading frame; #, antibody failed to be expressed; -, non-reactive; +, reactive;

c, cytoplasmic staining; N, nuclear staining

**Supplemental Table 11. Repertoire and reactivity of antibodies from mature naive B cells of MS04**

| Ig        | HEAVY  |              |     |    |                      | Length | LIGHT |    |             |        | REACTIVITY |      |          |
|-----------|--------|--------------|-----|----|----------------------|--------|-------|----|-------------|--------|------------|------|----------|
|           | VH     | D            | RF  | JH | CDR3 (aa)            |        | Vk    | Jk | CDR3 (aa)   | Length | Poly       | Hep2 | Staining |
| mMS04 49  | 3-23   | 2-21         | 2   | 4  | DLFYCGGDCYSPFFDY     | 16     | 3-20  | 3  | QQYGSSLFT   | 9      | -          | -    | -        |
| mMS04 53  | 3-15   | 1-26/<br>3-9 | 3/2 | 4  | DEVINDINGVGAIVVSSDY  | 17     | 3-11  | 4  | QQRSNWPPLT  | 10     | -          | -    | -        |
| mMS04 54  | 4-39   | 3-3          | 2   | 5  | LKDFWSGLRYQNNWFDP    | 17     | 1-39  | 1  | QQSYSTLPT   | 9      | -          | +    | c        |
| mMS04 55  | 1-18   | 1-26         | 1   | 4  | APPWELLYFDY          | 11     | 1-27  | 3  | QKYNSAPFT   | 9      | -          | -    | -        |
| mMS04 57  | 3-30   | 1-7          | 2   | 6  | EGSPRYNNWYAGYYYYGMDV | 20     | 2-28  | 5  | MQALQTPRT   | 9      | +          | +    | -        |
| mMS04 59  | 3-23   | 1-26         | 1   | 4  | DVTELPYFDY           | 11     | 3-20  | 4  | QQYGSSPQA   | 9      | -          | -    | -        |
| mMS04 60  | 3-33   | 3-22         | 2   | 6  | DYYDSSGYTTYYYYYGMDV  | 19     | 1-17  | 1  | LQHNSYPWT   | 9      | -          | -    | -        |
| mMS04 61  | 3-21   | 2-2          | 2   | 4  | DISYHCSSTSLGL        | 14     | 1-8   | 1  | QQYYSYPPT   | 9      | -          | +    | c        |
| mMS04 66  | 3-23   | 3-3          | 2   | 5  | GEYDFWGSYYEG         | 12     | 3-15  | 1  | QQYNNWPPT   | 9      | -          | +    | -        |
| mMS04 67  | 3-23   | 4-17         | 2   | 4  | DGDYVGMNYFDY         | 12     | 4-1   | 1  | QQYYSTLRA   | 9      | -          | -    | -        |
| mMS04 68  | 3-23   | 2-2          | 2   | 4  | DRVTSWRIPLDY         | 13     | 1-39  | 3  | QQSYSTPSFT  | 10     | +          | +    | -        |
| mMS04 71# | 3-30   | 5-12         | 2   | 4  | SGYSDYFDY            | 10     | 1-39  | 2  | QQSYSTPDS   | 9      |            |      |          |
| mMS04 77  | 3-23   | 3-22         | 2   | 4  | DSHYDPTYFDY          | 11     | 3-15  | 2  | QQYNNWPPCS  | 10     | -          | +    | -        |
| mMS04 79# | 1-18   | 6-19         | 1   | 4  | DRPDRQWLVDYFDY       | 13     | 2-30  | 2  | MQGTHWPPYS  | 10     |            |      |          |
| mMS04 86  | 3-9    | 3-3          | 1   | 3  | GRFLEWSDAFDI         | 12     | 1-39  | 2  | QQSYSTLMCS  | 10     | -          | +    | -        |
| mMS04 90  | 3-7    | 5-24         | 2   | 4  | ESDGSINYFDY          | 12     | 1-5   | 4  | QQYNSYSRT   | 9      | -          | -    | -        |
| mMS04 91  | 3-30   | 1-26         | 3   | 6  | VGVVGTATFGYGMVDV     | 14     | 1-33  | 4  | QQYDNLPLT   | 9      | -          | -    | -        |
| mMS04 92  | 3-74   | /            | /   | 4  | DRNRAPFDY            | 9      | 4-1   | 1  | QQYYSTPPA   | 9      | -          | -    | -        |
| mMS04 93  | 4-61   | 3-16         | 3   | 4  | DPFTFGGVIVKDY        | 13     | 2-29  | 2  | MQGIHLKS    | 8      | -          | -    | -        |
| mMS04 62  | 3-23   | 3-22         | 2   | 3  | EIYDSSGYGGVAFDI      | 16     |       |    |             |        |            |      |          |
| mMS04 56  |        |              |     |    |                      |        | 3-20  | 1  | QQYGSSPRT   | 9      |            |      |          |
| mMS04 63  |        |              |     |    |                      |        | 1-33  | 4  | QQYDNLPPRLT | 11     |            |      |          |
| mMS04 76  |        |              |     |    |                      |        | 3-15  | 2  | QQYNNWPPYS  | 10     |            |      |          |
| mMS04 80  |        |              |     |    |                      |        | 1-27  | 1  | QKYNSAPQT   |        |            |      |          |
|           | VH     | D            | RF  | JH | CDR3 (aa)            | Length | Vl    | Jl | CDR3 (aa)   | Length | Poly       | Hep2 | Staining |
| mMS04 50  | 3-30   | 3-16         | 2   | 3  | LYLDFYDYVWGSYRYLAFDI | 20     | 2-8   | 1  | SSYAGSNIGV  | 10     | -          | +    | -        |
| mMS04 51  | 3-30-3 | 5-5          | 3   | 4  | DKLVTRYFDY           | 11     | 3-21  | 2  | QVWDSDDHVV  | 11     | -          | -    | c        |
| mMS04 52  | 3-23   | 2-21         | 2   | 4  | VGGGICGGDCSSFDY      | 15     | 2-14  | 3  | SSYTSSTWV   | 10     | -          | -    | -        |
| mMS04 60# |        |              |     |    | see kappa            |        | 2-14  | 3  | SSYTSSTTRV  | 10     |            |      |          |
| mMS04 62  |        |              |     |    | see kappa            |        | 3-1   | 2  | QAWDSSTYVV  | 10     | -          | -    | -        |
| mMS04 82  | 4-31   | 6-19         | 2   | 5  | ANKKEYSSGWYDPSNWFDP  | 19     | 2-23  | 1  | CSYAGSSTYV  | 10     | -          | -    | -        |
| mMS04 85  | 3-23   | 1-26         | 2   | 5  | SGSYVGFWDY           | 11     | 1-51  | 2  | GTWDSLSVVV  | 11     | -          | -    | -        |
| mMS04 88  | 1-18   | 5-5          | 2   | 4  | VVVAGYSYGSTPYFDY     | 16     | 3-21  | 2  | QVWDSDDHYVV | 12     | -          | -    | -        |
| mMS04 89  | 3-21   | 3-3          | 3   | 4  | DHLIFGVVHISGFDY      | 15     | 1-40  | 2  | QSYDSSLGSVV | 12     | -          | -    | -        |
| mMS04 95  | 4-4    | 2-15         | 2   | 6  | EYCSGGSCYYYYYMDV     | 17     | 2-23  | 3  | CSYAGSSTFWV | 11     | -          | +    | c        |
| mMS04 96  | 4-59   | 2-21         | 2   | 3  | LAYCGGDCYSNDAFDI     | 16     | 1-47  | 3  | AAWDDSLSGV  | 10     | -          | -    | -        |

RF, reading frame; #, antibody failed to be expressed; -, non-reactive; +, reactive;

c, cytoplasmic staining; N, nuclear staining



**Supplemental Table 12. Repertoire and reactivity of antibodies from mature naive B cells of MS05**

| Ig        | HEAVY  |      |    |    |                         | Length | LIGHT |    |               |        | REACTIVITY |      |          |
|-----------|--------|------|----|----|-------------------------|--------|-------|----|---------------|--------|------------|------|----------|
|           | VH     | D    | RF | JH | CDR3 (aa)               |        | Vk    | Jk | CDR3 (aa)     | Length | Poly       | Hep2 | Staining |
| mMS05 49  | 3-53   | 5-24 | 3  | 6  | DTATTNYGMDV             | 11     | 1-39  | 2  | QQSYSTPYT     | 9      | -          | -    | c        |
| mMS05 52  | 3-11   | 6-13 | 3  | 6  | GIAAAAPSRASSKEGYYYGMDV  | 23     | 2-28  | 3  | MQALQTLFT     | 9      | -          | -    | -        |
| mMS05 53  | 3-9    | 6-19 | 2  | 4  | GGSGWYIMVDY             | 10     | 1-17  | 4  | LQHNSYPLT     | 9      | -          | -    | -        |
| mMS05 54  | 4-59   | 6-13 | 2  | 6  | DSGYSSWYSRAARLVDV       | 18     | 3-11  | 4  | QQRSNWLT      | 8      | +          | +    | c        |
| mMS05 58  | 4-34   | 2-2  | 2  | 6  | GYCSSTSCYTYGMDV         | 15     | 1-13  | 2  | QQFNYPCT      | 9      |            |      |          |
| mMS05 61  | 4-59   | 1-7  | 2  | 6  | SEGVHWNPPYYGMDV         | 15     | 4-1   | 2  | QQYSTPYT      | 9      | -          | +    | c        |
| mMS05 62  | 4-39   | 3-22 | 2  | 4  | PDDRRGFDY               | 9      | 1-5   | 2  | QQYNSMYT      | 9      | -          | +    | c        |
| mMS05 63  | 4-59   | 3-22 | 3  | 4  | VGSVVVTMSSYFDY          | 16     | 1D-8  | 1  | QQYSSFPWT     | 9      | -          | +    | -        |
| mMS05 65  | 3-23   | 3-3  | 2  | 3  | LYYYDSSGYRLLWGAFDI      | 20     | 1-33  | 5  | QQYDNLPT      | 9      | -          | -    | -        |
| mMS05 68  | 4-34   | 5-5  | 2  | 4  | GRGGYSARPRFDY           | 13     | 3-20  | 2  | QHRDT         | 5      | +          | +    | N        |
| mMS05 69  | 4-4    | 3-22 | 2  | 1  | DSRPRGRYFQH             | 11     | 1-39  | 4  | QQSYSTPLT     | 9      | +          | +    | c        |
| mMS05 71  | 3-30   | 3-10 | 1  | 4  | DSVALWFGEIRGLTFDY       | 17     | 3-20  | 5  | QQYSSIT       | 8      | +          | -    | -        |
| mMS05 73# | 1-24   | 3-22 | 3  | 4  | LMIVVDHQGGYFDY          | 14     | 3D-11 | 3  | QQRSNWPFT     | 9      |            |      |          |
| mMS05 74  | 1-69   | /    | /  | 5  | VSPYETTLAYLGEWFDP       | 19     | 2-30  | 4  | MQGTHWPKLT    | 10     | +          | +    | -        |
| mMS05 75  | 4-39   | 6-19 | 3  | 4  | SIAVAGFDY               | 10     | 1-9   | 4  | QQLNSYLLT     | 9      | -          | -    | -        |
| mMS05 80  | 3-30-3 | 3-22 | 3  | 4  | DPHIVVMYSYFDY           | 13     | 1-5   | 1  | QQYNSYRT      | 8      | -          | +    | -        |
| mMS05 81  | 3-11   | 3-9  | 2  | 4  | GFDILTGLDY              | 10     | 1-9   | 1  | QQLNSYPPWT    | 10     | -          | -    | -        |
| mMS05 83  | 3-23   | 6-19 | 3  | 4  | VAGLYAPGGRIAVAGTIDY     | 20     | 1D-8  | 1  | QQYSSFPWT     | 9      | -          | +    | -        |
| mMS05 84  | 3-33   | 6-13 | 2  | 6  | DLNSGSSWYGYYYGMDV       | 19     | 3-20  | 4  | QQYSSPLT      | 9      | -          | +    | c        |
| mMS05 85  | 3-9    | 6-19 | 3  | 6  | DRIAVDQWYYYGMDV         | 15     | 3-15  | 4  | QQYNNWPLT     | 9      | -          | +    | c        |
| mMS05 86  | 3-64   | 1-26 | 1  | 4  | GGELHRVFDY              | 10     | 1-17  | 4  | LQHNSYPRT     | 9      |            |      |          |
| mMS05 88  | 3-21   | 5-12 | 3  | 3  | DHDIVAGRAFDI            | 12     | 1-39  | 1  | QQSYSTPGT     | 9      |            |      |          |
| mMS05 89  | 1-69   | 3-22 | 2  | 5  | VNVGQDKDYDSSGYYYGWFDP   | 23     | 3-20  | 1  | QQYSSPKT      | 9      | -          | -    | -        |
| mMS05 91  | 4-34   | 5-5  | 2  | 4  | RGYSGYHRPMYFDY          | 15     | 3-15  | 3  | QQYNNWPPT     | 9      | -          | +    | c        |
| mMS05 95# | 3-30   | 2-2  | 2  | 6  | DQADFYCSSTSCSIGPYYYGMDV | 25     | 2-24  | 2  | MQATQFPYT     | 9      |            |      |          |
| mMS05 96  | 3-21   | 1-20 | 2  | 4  | EGNWDRGGDY              | 11     | 3-15  | 1  | QQYNNWPRT     | 9      | -          | +    | c        |
| mMS05 97  | 5-a    | 6-13 | 2  | 6  | ISFSSSLTQYYYYGMDV       | 18     |       |    |               |        |            |      |          |
| mMS05 98  |        |      |    |    |                         |        | 1-17  | 4  | LQLGLLT       | 8      |            |      |          |
|           | VH     | D    | RF | JH | CDR3 (aa)               | Length | Vk    | Jk | CDR3 (aa)     | Length | Poly       | Hep2 | Staining |
| mMS05 57  | 3-74   | 3-22 | 3  | 2  | EGGVVSGFDL              | 11     | 3-25  | 2  | QSADSSGTYPV   | 11     | -          | -    | -        |
| mMS05 58  |        |      |    |    | see kappa               |        | 1-44  | 3  | AAWDDSLNAWV   | 11     |            |      |          |
| mMS05 59  | 4-34   | 3-3  | 2  | 6  | GRYYDFWWSGYYYYGMDV      | 18     | 2-14  | 1  | SSYSSSTLSYV   | 12     | +          | +    | -        |
| mMS05 60  | 3-23   | /    | /  | 3  | EGVICDRISATQDAFDI       | 17     | 3-25  | 3  | QSADSSGTYEYV  | 11     | -          | +    | -        |
| mMS05 70  | 3-20   | 3-3  | 3  | 3  | DSQIFGVVIHADGAFDI       | 17     | 1-40  | 2  | QSYDSSLGYYV   | 12     | -          | -    | -        |
| mMS05 72  | 3-11   | /    | /  | 6  | DLGGKYYYYGMDV           | 14     | 2-14  | 2  | SSYSSSTLVV    | 11     | -          | -    | -        |
| mMS05 73  |        |      |    |    | see kappa               |        | 3-21  | 3  | QVWSSSDHWV    | 11     |            |      |          |
| mMS05 76  | 3-21   | 4-17 | 3  | 4  | VYTWWEYFDY              | 11     | 1-51  | 3  | GTWSSSLSAGV   | 11     | -          | -    | -        |
| mMS05 86  |        |      |    |    | see kappa               |        | 3-1   | 1  | QAWDSSTAV     | 9      |            |      |          |
| mMS05 88  |        |      |    |    | see kappa               |        | 2-14  | 3  | SSYSSSTWV     | 10     |            |      |          |
| mMS05 78  |        |      |    |    |                         |        | 1-47  | 1  | AAWDDSLGV     | 9      |            |      |          |
| mMS05 93  |        |      |    |    |                         |        | 2-23  | 1  | CSYAGSSTPPFYV | 13     |            |      |          |
| mMS05 94  |        |      |    |    |                         |        | 3-21  | 1  | QVWSSSDQGV    | 11     |            |      |          |

RF, reading frame; #, antibody failed to be expressed; -, non-reactive; +, reactive;

c, cytoplasmic staining; N, nuclear staining

**Supplemental Table 13. Repertoire and reactivity of antibodies from mature naive B cells of MS07**

| Ig        | HEAVY  |      |    |    |                           | Length | LIGHT |    |               |        | REACTIVITY |      |          |
|-----------|--------|------|----|----|---------------------------|--------|-------|----|---------------|--------|------------|------|----------|
|           | VH     | D    | RF | JH | CDR3 (aa)                 |        | Vk    | Jk | CDR3 (aa)     | Length | Poly       | Hep2 | Staining |
| mMS07 51  | 4-30-4 | 5-5  | 2  | 4  | SPVRGGYSYGFFDY            | 14     | 1D-8  | 1  | QQYYSFPWT     | 9      | -          | -    | -        |
| mMS07 52  | 4-34   | 3-3  | 2  | 4  | VTREHDFWSGYQKYYFDY        | 19     | 1-17  | 1  | LQHNSYPPT     | 9      | +          | +    | -        |
| mMS07 56  | 1-24   | 6-19 | 2  | 4  | GGYSSGWYPDY               | 11     | 1-39  | 1  | QQSYSTPWT     | 9      | -          | -    | -        |
| mMS07 58  | 4-34   | 3-10 | 3  | 4  | ARIQPWVRGAARLLHPTHYFDY    | 22     | 3-20  | 4  | QQYGSSPFT     | 9      | +          | +    | c        |
| mMS07 63  | 3-30   | 3-22 | 3  | 5  | GEVGRGMIVVIGIE            | 15     | 1-33  | 1  | QQYDNLQWT     | 9      | -          | +    | -        |
| mMS07 67# | 4-59   | 3-9  | 2  | 6  | GRSRAEYDILTGQGGGMDV       | 20     | 1-8   | 1  | QQYYSYPPGT    | 10     |            |      |          |
| mMS07 70  | 3-53   | 4-17 | 2  | 4  | GDYGDIPPFHY               | 12     | 1-12  | 4  | QQANSFPLT     | 9      | -          | -    | -        |
| mMS07 72  | 1-3    | 3-22 | 2  | 4  | DYYDSSGYPYFDY             | 13     | 3-20  | 2  | QQYGSSPMCS    | 10     | -          | +    | -        |
| mMS07 77  | 3-64   | 3-3  | 2  | 6  | DHPVGYDFWSGYSGTYYYGMDV    | 23     | 1-8   | 1  | QQYYSYPPWT    | 10     | +          | +    | c        |
| mMS07 79  | 3-33   | /    | /  | 6  | RSRSGNYYGMDV              | 13     | 2-40  | 1  | MQRIEFPWT     | 9      | -          | +    | -        |
| mMS07 80  | 5-51   | 2-15 | 2  | 4  | LGYCSCGSCWALDY            | 14     | 2-28  | 5  | MQALQTPPT     | 9      | -          | -    | -        |
| mMS07 83  | 3-30   | 6-6  | 1  | 6  | DRPQLDNYYGMDV             | 14     | 4-1   | 2  | QQYYSTPNT     | 9      | +          | +    | c        |
| mMS07 85  | 1-3    | 2-15 | 1  | 4  | GAYCSGGSCYFTGDY           | 15     | 4-1   | 5  | QQYYSTPSIT    | 10     | -          | +    | c+N      |
| mMS07 86  | 1-2    | 6-6  | 3  | 6  | DGSIARRGLYYGMDV           | 17     | 3-20  | 4  | QQYGSSLT      | 8      | -          | +    | -        |
| mMS07 88  | 1-2    | 3-22 | 2  | 6  | RTSYDSSGYDYYGMDV          | 18     | 1-39  | 2  | QQSYSTPYT     | 9      | -          | -    | -        |
| mMS07 91  | 3-30   | /    | /  | 6  | DWVYGMDV                  | 8      | 1-5   | 4  | QQYNSYSRTL    | 10     | -          | +    | c        |
| mMS07 94# | 4-59   | 4-17 | 2  | 2  | DRRYGDLPYWYFDL            | 15     | 1-39  | 4  | QQSYSTPPLT    | 10     |            |      |          |
| mMS07 49  | 4-31   | 4-17 | 2  | 4  | SYDYGDFTDY                | 10     |       |    |               |        |            |      |          |
| mMS07 54  | 5-a    | 4-4  | 2  | 4  | GDMTDYSNYVGTIDY           | 15     |       |    |               |        |            |      |          |
| mMS07 57  | 1-18   | 3-3  | 2  | 3  | GWVGTYYDFWSGYRSIFRSEDAFDI | 25     |       |    |               |        |            |      |          |
| mMS07 82  | 3-30   | /    | /  | 6  | DKDGLYGMDV                | 10     |       |    |               |        |            |      |          |
| mMS07 75  | 3-33   | 3-3  | 3  | 4  | DQGELGVVPDY               | 11     |       |    |               |        |            |      |          |
|           | VH     | D    | RF | JH | CDR3 (aa)                 | Length | Vk    | Jk | CDR3 (aa)     | Length | Poly       | Hep2 | Staining |
| mMS07 51  |        |      |    |    | see kappa                 |        | 3-1   | 2  | QAWDSSTAWDVV  | 12     | -          | -    | -        |
| mMS07 56  |        |      |    |    | see kappa                 |        | 1-44  | 2  | AAWDDSLNGHHVV | 13     | -          | -    | -        |
| mMS07 66  | 1-2    | /    | /  | 6  | ADTSWGMDV                 | 9      | 2-14  | 2  | SSPRV         | 5      | -          | +    | -        |
| mMS07 76  | 3-23   | 2-2  | 2  | 6  | RLVCSSTSCYTYYYGMDV        | 20     | 3-1   | 1  | QAWDSSTAGYV   | 11     | -          | -    | c        |
| mMS07 77  |        |      |    |    | see kappa                 |        | 3-1   | 2  | QAWDSSTVV     | 9      | +          | +    | c        |
| mMS07 78  | 3-30   | 5-12 | 3  | 4  | GRVVATPDY                 | 9      | 2-14  | 2  | SSYTSSSIVV    | 10     | -          | -    | -        |
| mMS07 86  |        |      |    |    | see kappa                 |        | 1-40  | 2  | QSYDSSLVV     | 10     | -          | +    | -        |
| mMS07 88  |        |      |    |    | see kappa                 |        | 1-44  | 3  | AAWDDSLNGLV   | 11     | -          | -    | -        |

RF, reading frame; #, antibody failed to be expressed; -, non-reactive; +, reactive;

c, cytoplasmic staining; N, nuclear staining

**Supplemental Table 14. Repertoire and reactivity of antibodies from mature naive B cells of MS23**

| Ig        | HEAVY |      |    |    |                           | Length | LIGHT |    |              |        | REACTIVITY |      |          |
|-----------|-------|------|----|----|---------------------------|--------|-------|----|--------------|--------|------------|------|----------|
|           | VH    | D    | RF | JH | CDR3 (aa)                 |        | Vk    | Jk | CDR3 (aa)    | Length | Poly       | Hep2 | Staining |
| mMS23 55  | 1-18  | 2-2  | 3  | 4  | ARSQRIVVPAQHGAFDY         | 18     | 2-28  | 2  | MQALQTPPT    | 9      | -          | -    | -        |
| mMS23 56  | 4-59  | 3-10 | 3  | 4  | ARHGYSGPVRGVLTLTDY        | 17     | 1-33  | 3  | QQYDNLPT     | 9      | -          | -    | -        |
| mMS23 58  | 3-33  | 3-10 | 1  | 4  | AKDQVSLWFGELEY            | 14     | 2-29  | 4  | MQGIHLPLT    | 9      | -          | +    | -        |
| mMS23 60  | 4-39  | 6-19 | 3  | 4  | ARHGYDTVAQLDY             | 13     | 4-1   | 2  | QQYYSPTPT    | 9      | -          | -    | -        |
| mMS23 61  | 3-11  | 1-20 | 2  | 4  | AREGLVSWNDLERPFYD         | 17     | 1-8   | 1  | QQYYSYPRT    | 9      | -          | +    | -        |
| mMS23 62# | 4-b   | /    | /  | 6  | ARKHYYYGMDV               | 11     | 1-6   | 1  | LQDYNLYS     | 8      |            |      |          |
| mMS23 63  | 4-59  | 6-19 | 3  | 4  | ASGAVAGTSYFDY             | 13     | 3-20  | 1  | QQYGSSPRT    | 9      | -          | -    | -        |
| mMS23 65  | 3-21  | 2-21 | 3  | 3  | ARDGIVVTVLAFDI            | 15     | 1-13  | 4  | QQFNSYPLT    | 9      | -          | -    | -        |
| mMS23 66  | 3-48  | 2-2  | 2  | 6  | ARDGPGYCSSTSCYWAVDYYYGMDV | 26     | 3-15  | 1  | QQYNNWPPYT   | 10     | +          | +    | c        |
| mMS23 67  | 3-23  | 6-19 | 3  | 4  | ANILAGLGN                 | 10     | 2-30  | 2  | MQGTHWPPRYT  | 11     | +          | +    | -        |
| mMS23 70  | 4-4   | 2-2  | 2  | 4  | ARVRYCSSTSCYGLDY          | 16     | 1-33  | 2  | QQYDNLPT     | 9      | -          | -    | -        |
| mMS23 71  | 4-59  | /    | /  | 3  | ARDAEDTVAFDI              | 12     | 2-28  | 3  | MQALQTPPT    | 9      | -          | -    | -        |
| mMS23 72# | 1-8   | 1-7  | 1  | 5  | ARDRLERRGWFD              | 14     | 3-20  | 1  | QQYGSSPWT    | 9      |            |      |          |
| mMS23 76# | 1-18  | 3-10 | 1  | 4  | ARDFAAWFGELLPFDY          | 16     | 2-29  | 1  | MQGIHLPQT    | 9      |            |      |          |
| mMS23 82# | 1-18  | 3-22 | 3  | 6  | ARDNSITMIVVVRDYDMDV       | 20     | 1-39  | 1  | QQSYSTPWT    | 9      |            |      |          |
| mMS23 86  | 4-34  | 6-13 | 2  | 2  | ARVRLDSSSWYHWYFDL         | 17     | 1-5   | 1  | QQYNSYPPWT   | 10     | -          | +    | c        |
| mMS23 87  | 4-59  | 1-26 | 3  | 4  | ARGFVGATGFDY              | 12     | 4-1   | 2  | QQYYSPTPT    | 9      | -          | +    | -        |
| mMS23 89  | 4-34  | 6-19 | 1  | 4  | ARGRQWLVLVDY              | 12     | 3-20  | 1  | QQYGSSPRT    | 10     | -          | +    | c        |
| mMS23 95  | 4-34  | 1-26 | 2  | 4  | ARSGNSGSYSYFDY            | 14     | 3-20  | 1  | QQYGSSSTWT   | 9      | -          | +    | c        |
| mMS23 64  | 4-34  | 3-10 | 3  | 4  | ARGGRITMVRGIDY            | 14     |       |    |              |        |            |      |          |
| mMS23 68  | 1-2   | 6-13 | 2  | 5  | ASRDYSSNWYNWFDP           | 15     |       |    |              |        |            |      |          |
| mMS23 69  | 1-46  | 6-13 | 2  | 2  | ARDVRDSSSWYGYWYFDL        | 17     |       |    |              |        |            |      |          |
| mMS23 94  |       |      |    |    |                           |        | 3-20  | 4  | QQYGSSPLT    | 9      |            |      |          |
|           | VH    | D    | RF | JH | CDR3 (aa)                 | Length | Vl    | Jl | CDR3 (aa)    | Length | Poly       | Hep2 | Staining |
| mMS23 51# | 1-2   | 6-19 | 1  | 2  | ARDLGRQWLVLWDYFDL         | 17     | 1-44  | 2  | AAWDDSLNGQVV | 12     |            |      |          |
| mMS23 55  |       |      |    |    | see kappa                 |        | 1-40  | 2  | QSYDSSLSVV   | 10     | -          | -    | -        |
| mMS23 63  |       |      |    |    | see kappa                 |        | 1-47  | 2  | AAWDDSLSGVV  | 11     | -          | -    | -        |
| mMS23 70  |       |      |    |    | see kappa                 |        | 1-40  | 2  | QSYDSSPVV    | 9      | -          | +    | +        |
| mMS23 71  |       |      |    |    | see kappa                 |        | 3-1   | 2  | QAWDSSTVV    | 9      | -          | -    | -        |
| mMS23 78  | 1-18  | 1-26 | 3  | 6  | AREGATAYYYGMDV            | 15     | 2-23  | 2  | CSYAGSSTSVV  | 11     | -          | +    | c        |
| mMS23 79  | 3-30  | 5-12 | 3  | 3  | ARDEEDIVATIPSGGAFDI       | 19     | 1-40  | 2  | QSYDSSLSGSV  | 11     | -          | -    | -        |
| mMS23 90  | 5-51  | 3-9  | 2  | 4  | ARLDILTGYLDY              | 13     | 3-1   | 2  | QAWDSSTVV    | 9      | -          | -    | -        |
| mMS23 81  |       |      |    |    |                           |        | 3-1   | 2  | QAWDSSTAVDV  | 12     |            |      |          |

RF, reading frame; #, antibody failed to be expressed; -, non-reactive; +, reactive;

c, cytoplasmic staining; N, nuclear staining

**Supplemental Table 15. Repertoire and reactivity of antibodies from mature naive B cells of MS31**

| Ig        | HEAVY |      |    |    |                       | LIGHT  |       |     |              |        | REACTIVITY |      |          |
|-----------|-------|------|----|----|-----------------------|--------|-------|-----|--------------|--------|------------|------|----------|
|           | VH    | D    | RF | JH | CDR3 (aa)             | Length | Vk    | Jk  | CDR3 (aa)    | Length | Poly       | Hep2 | Staining |
| mMS31 49  | 1-69  | 2-15 | 2  | 4  | MGHYCSGGSCYSY         | 13     | 1-16  | 4   | QQYNSYPLT    | 9      | -          | +    | -        |
| mMS31 54  | 3-9   | 6-13 | 3  | 6  | DTAAAVVGRYYYYGMDV     | 17     | 1-39  | 2   | QQSYSTPYT    | 9      | -          | +    | -        |
| mMS31 57  | 1-2   | 2-15 | 2  | 4  | APHGLGYCSGGSCYSFCFDY  | 20     | 2D-29 | 1   | MQSIQLPWT    | 9      | -          | +    | -        |
| mMS31 61  | 3-21  | 3-9  | 2  | 4  | DHPLTGYGHSDLDY        | 15     | 1-27  | 3   | QKYNSAPFT    | 9      | -          | -    | -        |
| mMS31 71  | 1-46  | 3-22 | 2  | 3  | VGRGYDSSGYLDAFDI      | 17     | 3-20  | 4   | QQYGSSPLT    | 9      | -          | -    | -        |
| mMS31 78  | 4-39  | 7-27 | 3  | 4  | NPSMPWGLTLFFDY        | 14     | 3-20  | 1   | QQYGSSPRT    | 9      | -          | -    | -        |
| mMS31 80  | 3-33  | 6-19 | 2  | 4  | DADRSSGWLFDY          | 12     | 1-39  | 4   | QQSYSTPLT    | 9      | -          | -    | -        |
| mMS31 89  | 4-34  | 3-22 | 2  | 4  | GGSSGYYYWQRLFDY       | 17     | 1-17  | 1   | LQHNSYPRT    | 9      | +          | +    | c        |
| mMS31 173 | 3-11  | 2-2  | 2  | 6  | YDYCSSTSCYRPTYYYYGMDV | 21     | 2-28  | 1   | MQALQTRGT    | 9      | -          | +    | -        |
| mMS31 179 | 3-23  | 4-23 | 3  | 4  | DYLTTVVTPDIIDY        | 14     | 3-11  | 5   | QQRSNWPPT    | 9      | -          | -    | -        |
| mMS31 180 | 4-34  | 5-5  | 2  | 6  | GRGRGYSYGPYYYYGMDV    | 19     | 3-20  | 1   | QQYGSSPRT    | 9      | +          | +    | c        |
| mMS31 185 | 3-23  | 6-13 | 2  | 4  | DDEMYSSSWYGFY         | 14     | 1-39  | 4   | QQYSTLLLT    | 10     | -          | +    | -        |
| mMS31 188 | 4-34  | 1-26 | 2  | 4  | GPVYSGSYFRGRPSHYFFDY  | 20     | 1-5   | 2   | QQYNSWCS     | 8      | +          | +    | -        |
| mMS31 189 | 4-34  | 3-3  | 3  | 5  | SQRITIFGVALPNWFDP     | 17     | 3-15  | 1   | QQYNNWPKT    | 9      | +          | +    | -        |
| mMS31 192 | 5-51  | 3-3  | 2  | 6  | TYDFWSGSYYYGMDV       | 15     | 2-28  | 1   | MQALQTPGT    | 9      | -          | -    | -        |
| mMS31 187 | 1-46  | 3-16 | 2  | 4  | GKGYDYVFGY            | 11     |       |     |              |        |            |      |          |
| mMS31 93  | 3-23  | 3-10 | 2  | 6  | EARLIEAYYGSGPPKYGMDV  | 21     |       |     |              |        |            |      |          |
|           | VH    | D    | RF | JH | CDR3 (aa)             | Length | Vj.   | Jj. | CDR3 (aa)    | Length | Poly       | Hep2 | Staining |
| mMS31 49# |       |      |    |    | see kappa             |        | 1-47  | 2   | AAWDDSLSGRV  | 11     |            |      |          |
| mMS31 51  | 4-34  | 4-17 | 2  | 4  | GHYGDYDGDY            | 11     | 1-44  | 1   | AAWDDSLNGRYV | 12     | -          | -    | -        |
| mMS31 62  | 4-61  | 2-15 | 2  | 4  | YWPYCSGGSCYAFDY       | 15     | 1-44  | 2   | AAWDDSLNGPVV | 12     | -          | -    | -        |
| mMS31 63  | 4-34  | 4-17 | 2  | 3  | PPNYGRDAFDI           | 11     | 2-11  | 1   | CSYAGSSYV    | 9      | -          | +    | -        |
| mMS31 70# | 5-51  | 3-9  | 2  | 4  | GRYYDILTGYAHFDY       | 15     | 2-14  | 1   | SSYTSSTLEV   | 11     |            |      |          |
| mMS31 71  |       |      |    |    | see kappa             |        | 2-11  | 3   | CSYAGSYTWV   | 10     | -          | -    | -        |
| mMS31 91  | 3-48  | /    | /  | 4  | IDY                   | 3      | 6-57  | 3   | QSYDSSNWV    | 9      | -          | -    | -        |
| mMS31 92  | 4-39  | 6-19 | 2  | 3  | LAGYSSGGNAFDI         | 13     | 1-51  | 3   | GTWDDSLSAGV  | 11     | -          | -    | -        |
| mMS31 174 | 3-33  | 3-22 | 2  | 4  | DFDYDSSGYHGLDY        | 15     | 1-44  | 3   | AAWDDSLNGWV  | 11     | -          | -    | -        |
| mMS31 193 | 3-48  | 3-3  | 2  | 4  | FDWSAVRDY             | 10     | 1-44  | 2   | AAWDDSLNGVV  | 11     | -          | -    | -        |

RF, reading frame; #, antibody failed to be expressed; -, non-reactive; +, reactive;

c, cytoplasmic staining; N, nuclear staining
